# Supplementary material for: Role of the hydrophobicity on the thermodynamic and kinetic acidity of Fischer thiocarbene complexes
Source: Royal Society of Chemistry journal article supplement (doi:10.1039/c000141d), 2010-01-01

## Role of the Hydrophobicity on the Thermodynamic and Kinetic Acidity of Fischer Thiocarbene Complexes.

*Diego M. Andrada, Martin E. Zoloff Michoff, Rita H. de Rossi and Alejandro M. Granados\*.*

Instituto de Investigaciones Fisicoquímicas de Córdoba (INFIQC), Departamento de Química Orgánica, Facultad de Ciencias Químicas, Universidad Nacional de Córdoba, Ciudad Universitaria, Córdoba, Argentina.

E-mail: [ale@mail.fcq.unc.edu.ar](mailto:ale@mail.fcq.unc.edu.ar)

### Table of Contents:

- S2 **Fig S1.** UV spectra showing the recovery of the anion of the Fischer carbene **W-Sc-Hex** upon acidification.
- S3 **Tables S1-S40.** Kinetic data for the reactions of **W-SR** with KOH and amine buffers.
- S20 Cartesian coordinates (in Å) and total energy (a. u.) for the computational calculations.
- S36 **Table S41.** Contributions of the solvation free energy for Fischer carbene complexes in acetonitrile
- S37 **Fig S2.** Plot of  $\Delta G_{\text{cav}}$  (in kcal/mol) vs.  $\text{p}K_{\text{a}}^{\text{CH}}$  for neutral Fischer carbenes **Cr-SR** and their corresponding anions.
- S38 **Fig S3.** Plot of  $\Delta G_{\text{cav}}$  (in kcal/mol) vs.  $\log P$  for the neutral Fischer carbenes **Cr-SR** and **W-SR**.
- S39 Spectroscopic characterization (HRMS (FAB), UV-vis,  $^1\text{H}$  NMR,  $^{13}\text{C}$  NMR and IR spectra) for **W-SR**.

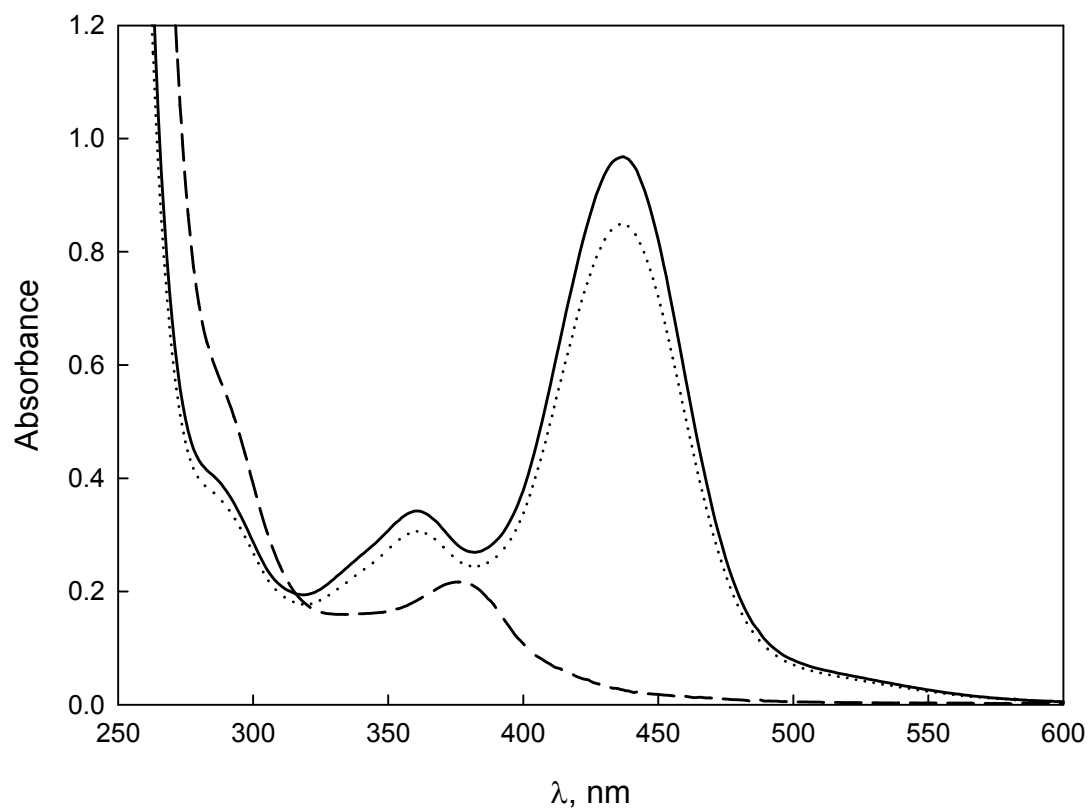

**Fig. S1.** UV-vis spectra of (—)  $1 \times 10^{-4}$  M **W-Sc-Hex** in 50% MeCN – 50% water at 25°C, (---) the corresponding anion obtained in  $5 \times 10^{-4}$  M KOH and (···) recovery upon acidification.

**Table S1.** Proton transfer reaction of KOH with **W-Sn-Bu**.<sup>a</sup>

| [KHO], M <sup>b</sup> | $k_{\text{obs}}$ , s <sup>-1</sup> |
|-----------------------|------------------------------------|
| 0.0010                | 0.882 ± 0.002                      |
| 0.0025                | 2.372 ± 0.005                      |
| 0.0050                | 4.80 ± 0.01                        |
| 0.0100                | 8.26 ± 0.02                        |
| 0.0175                | 17.17 ± 0.05                       |
| 0.0250                | 25.4 ± 0.1                         |
| 0.0375                | 37.15 ± 0.06                       |

<sup>a</sup>Acetonitrile:Water (1:1 V/V), 25°C,  $\mu = 0.1$  M (KCl), [W-Sn-Bu] = 1.00 x 10<sup>-4</sup> M. Monitored at 436 nm in a stopped-flow apparatus. <sup>b</sup> These values have been computed as 10<sup>-(15,19-pH)</sup>.

**Table S2.** Proton transfer reaction of morpholine with **W-Sn-Bu**.<sup>a</sup>

| pH   | [Buffer], M | [MorfH <sup>+</sup> ], M | $k_{\text{obs}}$ , s <sup>-1</sup> |
|------|-------------|--------------------------|------------------------------------|
| 7.80 | 0.0250      | 0.0222                   | 20.68 ± 0.03                       |
|      | 0.0375      | 0.0333                   | 25.41 ± 0.06                       |
|      | 0.0500      | 0.0444                   | 32.73 ± 0.08                       |
|      | 0.0625      | 0.0555                   | 40.4 ± 0.2                         |
|      | 0.0750      | 0.0666                   | 48.5 ± 0.2                         |
|      | 0.0875      | 0.0777                   | 56.1 ± 0.4                         |
|      | 0.1000      | 0.0888                   | 61.0 ± 0.3                         |
| 8.30 | 0.0125      | 0.0089                   | 12.73 ± 0.03                       |
|      | 0.0250      | 0.0179                   | 16.80 ± 0.02                       |
|      | 0.0375      | 0.0268                   | 24.37 ± 0.03                       |
|      | 0.0500      | 0.0358                   | 32.3 ± 0.1                         |
|      | 0.0625      | 0.0447                   | 39.8 ± 0.3                         |
|      | 0.0750      | 0.0536                   | 48.3 ± 0.2                         |
|      | 0.1000      | 0.0715                   | 61.9 ± 0.3                         |
| 8.50 | 0.0125      | 0.0077                   | 12.75 ± 0.04                       |
|      | 0.0250      | 0.0153                   | 16.37 ± 0.01                       |
|      | 0.0375      | 0.0230                   | 23.82 ± 0.03                       |
|      | 0.0500      | 0.0307                   | 32.3 ± 0.2                         |
|      | 0.0625      | 0.0383                   | 39.6 ± 0.1                         |
|      | 0.0750      | 0.0460                   | 47.7 ± 0.2                         |
|      | 0.1000      | 0.0613                   | 63.0 ± 0.4                         |
| 8.88 | 0.0125      | 0.00498                  | 11.21 ± 0.07                       |

|      |        |         |              |
|------|--------|---------|--------------|
|      | 0.0250 | 0.00995 | 15.8 ± 0.1   |
|      | 0.0375 | 0.01493 | 23.3 ± 0.1   |
|      | 0.0500 | 0.01990 | 32.5 ± 0.1   |
|      | 0.0625 | 0.02488 | 40.8 ± 0.2   |
|      | 0.0750 | 0.02985 | 48.0 ± 0.3   |
|      | 0.1000 | 0.03980 | 61.9 ± 0.4   |
| 9.00 | 0.0125 | 0.00417 | 7.96 ± 0.03  |
|      | 0.0250 | 0.00835 | 15.9 ± 0.1   |
|      | 0.0375 | 0.01252 | 23.50 ± 0.08 |
|      | 0.0500 | 0.01669 | 32.04 ± 0.09 |
|      | 0.0625 | 0.02087 | 40.6 ± 0.1   |
|      | 0.0750 | 0.02504 | 48.2 ± 0.3   |
|      | 0.1000 | 0.03339 | 63.9 ± 0.5   |
| 9.27 | 0.0125 | 0.00265 | 9.95 ± 0.05  |
|      | 0.0250 | 0.00530 | 15.45 ± 0.09 |
|      | 0.0375 | 0.00795 | 23.31 ± 0.07 |
|      | 0.0500 | 0.01060 | 32.70 ± 0.06 |
|      | 0.0625 | 0.01326 | 40.5 ± 0.2   |
|      | 0.0750 | 0.01591 | 49.0 ± 0.2   |

<sup>a</sup>Acetonitrile:Water (1:1 V/V), 25°C,  $\mu = 0.1$  M (KCl),  $[\mathbf{W-Sn-Bu}] = 1.00 \times 10^{-4}$  M. Monitored at 436 nm in a stopped-flow apparatus.

**Table S3.** Proton transfer reaction of Piperidine with  $\mathbf{W-Sn-Bu}$ .<sup>a</sup>

| [Buffer], M | [B], M  | $k_{\text{obs}}, \text{s}^{-1}$ |
|-------------|---------|---------------------------------|
| 0.0125      | 0.00625 | 42.7 ± 0.3                      |
| 0.0250      | 0.01250 | 107.0 ± 0.5                     |
| 0.0375      | 0.01875 | 171 ± 1                         |
| 0.0500      | 0.02500 | 233 ± 1                         |
| 0.0625      | 0.03125 | 317 ± 3                         |
| 0.0750      | 0.03750 | 411 ± 4                         |
| 0.1000      | 0.05000 | 618 ± 7                         |

<sup>a</sup>Acetonitrile:Water (1:1 V/V), 25°C,  $\mu = 0.1$  M (KCl),  $[\mathbf{W-Sn-Bu}] = 1.00 \times 10^{-4}$  M, pH = 11.01. Monitored at 436 nm in a stopped-flow apparatus.

**Table S4.** Proton transfer reaction of Piperazine with **W-Sn-Bu**.<sup>a</sup>

| [Buffer], M | [B], M  | $k_{\text{obs}}$ , s <sup>-1</sup> |
|-------------|---------|------------------------------------|
| 0.0125      | 0.00625 | 9.9 ± 0.1                          |
| 0.0250      | 0.01250 | 23.2 ± 0.2                         |
| 0.0375      | 0.01875 | 36.5 ± 0.2                         |
| 0.0500      | 0.02500 | 48.69 ± 0.08                       |
| 0.0625      | 0.03125 | 64.4 ± 0.2                         |
| 0.0750      | 0.03750 | 77 ± 1                             |
| 0.1000      | 0.05000 | 106.7 ± 0.7                        |

<sup>a</sup>Acetonitrile:Water (1:1 V/V), 25°C,  $\mu = 0.1$  M (KCl), [**W-Sn-Bu**] = 1.00 x 10<sup>-4</sup> M, pH = 9.97.

Monitored at 436 nm in a stopped-flow apparatus.

**Table S5.** Proton transfer reaction of HEPA with **W-Sn-Bu**.<sup>a</sup>

| [Buffer], M | [B], M  | $k_{\text{obs}}$ , s <sup>-1</sup> |
|-------------|---------|------------------------------------|
| 0.0125      | 0.00625 | 5.61 ± 0.06                        |
| 0.0250      | 0.01250 | 11.4 ± 0.1                         |
| 0.0375      | 0.01875 | 17.0 ± 0.1                         |
| 0.0500      | 0.02500 | 22.8 ± 0.2                         |
| 0.0625      | 0.03125 | 29.11 ± 0.09                       |
| 0.0750      | 0.03750 | 35.5 ± 0.1                         |
| 0.1000      | 0.05000 | 47.3 ± 0.3                         |

<sup>a</sup>Acetonitrile:Water (1:1 V/V), 25°C,  $\mu = 0.1$  M (KCl), [**W-Sn-Bu**] = 1.00 x 10<sup>-4</sup> M, pH = 9.33.

Monitored at 436 nm in a stopped-flow apparatus.

**Table S6.** Proton transfer reaction of n-butylamine with **W-Sn-Bu**.<sup>a</sup>

| [Buffer], M | [B], M  | $k_{\text{obs}}$ , s <sup>-1</sup> |
|-------------|---------|------------------------------------|
| 0.0125      | 0.00625 | 15.7 ± 0.1                         |
| 0.0250      | 0.01250 | 32.37 ± 0.06                       |
| 0.0375      | 0.01875 | 48.3 ± 0.2                         |
| 0.0500      | 0.02500 | 66.3 ± 0.2                         |
| 0.0625      | 0.03125 | 84.4 ± 0.4                         |
| 0.0750      | 0.03750 | 103.0 ± 0.7                        |
| 0.1000      | 0.05000 | 140.7 ± 0.4                        |

<sup>a</sup>Acetonitrile:Water (1:1 V/V), 25°C,  $\mu = 0.1$  M (KCl), [**W-Sn-Bu**] = 1.00 x 10<sup>-4</sup> M, pH = 10.40.

Monitored at 436 nm in a stopped-flow apparatus.

**Table S7.** Proton transfer reaction of MeOCH<sub>2</sub>CH<sub>2</sub>NH<sub>2</sub> with **W-Sn-Bu**.<sup>a</sup>

| [Buffer], M | [B], M  | $k_{\text{obs}}$ , s <sup>-1</sup> |
|-------------|---------|------------------------------------|
| 0.0125      | 0.00625 | 3.36 ± 0.05                        |
| 0.0250      | 0.01250 | 6.71 ± 0.02                        |
| 0.0375      | 0.01875 | 10.87 ± 0.06                       |
| 0.0500      | 0.02500 | 14.43 ± 0.05                       |
| 0.0625      | 0.03125 | 17.70 ± 0.05                       |
| 0.0750      | 0.03750 | 22.19 ± 0.09                       |
| 0.1000      | 0.05000 | 29.81 ± 0.04                       |

<sup>a</sup>Acetonitrile:Water (1:1 V/V), 25°C,  $\mu = 0.1$  M (KCl), [**W-Sn-Bu**] =  $1.00 \times 10^{-4}$  M, pH = 9.39. Monitored at 436 nm in a stopped-flow apparatus.

**Table S8.** Proton transfer reaction of Benzylamine with **W-Sn-Bu**.<sup>a</sup>

| [Buffer], M | [B], M  | $k_{\text{obs}}$ , s <sup>-1</sup> |
|-------------|---------|------------------------------------|
| 0.0125      | 0.00625 | 8.93 ± 0.04                        |
| 0.0250      | 0.01250 | 20.2 ± 0.1                         |
| 0.0375      | 0.01875 | 30.84 ± 0.06                       |
| 0.0500      | 0.02500 | 42.0 ± 0.1                         |
| 0.0625      | 0.03125 | 54.0 ± 0.2                         |
| 0.0750      | 0.03750 | 65.9 ± 0.2                         |
| 0.1000      | 0.05000 | 92.2 ± 0.8                         |

<sup>a</sup>Acetonitrile:Water (1:1 V/V), 25°C,  $\mu = 0.1$  M (KCl), [**W-Sn-Bu**] =  $1.00 \times 10^{-4}$  M, pH = 9.12. Monitored at 436 nm in a stopped-flow apparatus.

**Table S9.** Proton transfer reaction of Furfurylamine with **W-Sn-Bu**.<sup>a</sup>

| [Buffer], M | [B], M  | $k_{\text{obs}}$ , s <sup>-1</sup> |
|-------------|---------|------------------------------------|
| 0.0125      | 0.00625 | 6.26 ± 0.04                        |
| 0.0250      | 0.01250 | 12.9 ± 0.1                         |
| 0.0375      | 0.01875 | 19.39 ± 0.06                       |
| 0.0500      | 0.02500 | 26.02 ± 0.06                       |
| 0.0625      | 0.03125 | 32.3 ± 0.1                         |
| 0.0750      | 0.03750 | 38.6 ± 0.2                         |
| 0.1000      | 0.05000 | 51.4 ± 0.2                         |

<sup>a</sup>Acetonitrile:Water (1:1 V/V), 25°C,  $\mu = 0.1$  M (KCl), [**W-Sn-Bu**] =  $1.00 \times 10^{-4}$  M, pH = 8.58. Monitored at 436 nm in a stopped-flow apparatus.

**Table S10.** Proton transfer reaction of EtOCOCH<sub>2</sub>NH<sub>2</sub> with **W-Sn-Bu**.<sup>a</sup>

| [Buffer], M | [HB <sup>+</sup> ], M | $k_{\text{obs.}} \text{ s}^{-1}$ |
|-------------|-----------------------|----------------------------------|
| 0.0125      | 0.00625               | 11.23 ± 0.04                     |
| 0.0250      | 0.01250               | 20.75 ± 0.06                     |
| 0.0375      | 0.01875               | 28.32 ± 0.09                     |
| 0.0500      | 0.02500               | 37.8 ± 0.2                       |
| 0.0625      | 0.03125               | 45.4 ± 0.3                       |
| 0.0750      | 0.03750               | 53.2 ± 0.4                       |
| 0.1000      | 0.05000               | 66.3 ± 0.5                       |

<sup>a</sup>Acetonitrile:Water (1:1 V/V), 25°C,  $\mu = 0.1 \text{ M}$  (KCl), [**W-Sn-Bu**] =  $1.00 \times 10^{-4} \text{ M}$ , pH = 7.43.

Monitored at 436 nm in a stopped-flow apparatus.

**Table S11.** Proton transfer reaction of KOH with **W-St-Bu**.<sup>a</sup>

| [KOH], M <sup>b</sup> | $k_{\text{obs.}} \text{ s}^{-1}$ |
|-----------------------|----------------------------------|
| 0.0010                | 0.767 ± 0.002                    |
| 0.0025                | 2.669 ± 0.005                    |
| 0.0050                | 5.34 ± 0.01                      |
| 0.0100                | 11.9 ± 0.1                       |
| 0.0175                | 22.18 ± 0.03                     |
| 0.0250                | 31.7 ± 0.3                       |
| 0.0375                | 48.5 ± 0.8                       |

<sup>a</sup>Acetonitrile:Water (1:1 V/V), 25°C,  $\mu = 0.1 \text{ M}$  (KCl), [**W-St-Bu**] =  $1.00 \times 10^{-4} \text{ M}$ . Monitored at 441 nm in a stopped-flow apparatus. <sup>b</sup> These values have been computed as  $10^{-(15.19-\text{pH})}$ .

**Table S12.** Proton transfer reaction of morpholine with **W-St-Bu**.<sup>a</sup>

| pH   | [Buffer], M | [MorfH <sup>+</sup> ], M | $k_{\text{obs.}} \text{ s}^{-1}$ |
|------|-------------|--------------------------|----------------------------------|
| 7.80 | 0.0250      | 0.0222                   | 10.11 ± 0.01                     |
|      | 0.0375      | 0.0333                   | 15.45 ± 0.01                     |
|      | 0.0500      | 0.0444                   | 20.42 ± 0.03                     |
|      | 0.0625      | 0.0555                   | 25.69 ± 0.04                     |
|      | 0.0750      | 0.0666                   | 30.47 ± 0.06                     |
|      | 0.0875      | 0.0777                   | 35.5 ± 0.1                       |
|      | 0.1000      | 0.0888                   | 40.12 ± 0.09                     |
| 8.30 | 0.0125      | 0.0089                   | 6.61 ± 0.01                      |
|      | 0.0250      | 0.0179                   | 10.24 ± 0.01                     |

|      |        |         |               |
|------|--------|---------|---------------|
|      | 0.0375 | 0.0268  | 15.36 ± 0.02  |
|      | 0.0500 | 0.0358  | 20.38 ± 0.03  |
|      | 0.0625 | 0.0447  | 25.58 ± 0.04  |
|      | 0.0750 | 0.0536  | 30.92 ± 0.05  |
|      | 0.1000 | 0.0715  | 41.3 ± 0.4    |
| 8.50 | 0.0125 | 0.0077  | 7.79 ± 0.04   |
|      | 0.0250 | 0.0153  | 10.85 ± 0.03  |
|      | 0.0375 | 0.0230  | 15.31 ± 0.02  |
|      | 0.0500 | 0.0307  | 21.26 ± 0.03  |
|      | 0.0625 | 0.0383  | 26.3 ± 0.1    |
|      | 0.0750 | 0.0460  | 31.54 ± 0.04  |
|      | 0.1000 | 0.0613  | 40.8 ± 0.2    |
| 8.88 | 0.0125 | 0.00498 | 5.12 ± 0.02   |
|      | 0.0250 | 0.00995 | 10.01 ± 0.03  |
|      | 0.0375 | 0.01493 | 15.01 ± 0.06  |
|      | 0.0500 | 0.01990 | 21.0 ± 0.1    |
|      | 0.0625 | 0.02488 | 26.3 ± 0.1    |
|      | 0.0750 | 0.02985 | 31.6 ± 0.1    |
|      | 0.1000 | 0.03980 | 43.2 ± 0.2    |
| 9.00 | 0.0125 | 0.00417 | 7.15 ± 0.02   |
|      | 0.0250 | 0.00835 | 10.9 ± 0.05   |
|      | 0.0375 | 0.01252 | 15.99 ± 0.08  |
|      | 0.0500 | 0.01669 | 21.69 ± 0.09  |
|      | 0.0625 | 0.02087 | 28.44 ± 0.06  |
|      | 0.0750 | 0.02504 | 33.44 ± 0.06  |
|      | 0.1000 | 0.03339 | 44.3 ± 0.2    |
| 9.27 | 0.0125 | 0.00265 | 5.475 ± 0.008 |
|      | 0.0250 | 0.00530 | 11.21 ± 0.05  |
|      | 0.0375 | 0.00795 | 16.6 ± 0.1    |
|      | 0.0500 | 0.01060 | 22.83 ± 0.05  |
|      | 0.0625 | 0.01326 | 27.9 ± 0.1    |
|      | 0.0750 | 0.01591 | 33.7 ± 0.1    |

<sup>a</sup>Acetonitrile:Water (1:1 V/V), 25°C,  $\mu = 0.1$  M (KCl),  $[\mathbf{W-Sr-Bu}] = 1.00 \times 10^{-4}$  M. Monitored at 441 nm in a stopped-flow apparatus.



**Table S13.** Proton transfer reaction of piperidine with **W-St-Bu**.<sup>a</sup>

| [Buffer], M | [B], M  | $k_{\text{obs}}$ , s <sup>-1</sup> |
|-------------|---------|------------------------------------|
| 0.0125      | 0.00625 | 27.1 ± 0.1                         |
| 0.0250      | 0.01250 | 70.3 ± 0.5                         |
| 0.0375      | 0.01875 | 102.9 ± 0.6                        |
| 0.0500      | 0.02500 | 143.0 ± 0.8                        |
| 0.0625      | 0.03125 | 179.9 ± 0.5                        |
| 0.0750      | 0.03750 | 223 ± 1                            |
| 0.1000      | 0.05000 | 317 ± 2                            |

<sup>a</sup>Acetonitrile:Water (1:1 V/V), 25°C,  $\mu = 0.1$  M (KCl), [**W-St-Bu**] = 1.00 x 10<sup>-4</sup> M, pH = 11.01.

Monitored at 441 nm in a stopped-flow apparatus.

**Table S14.** Proton transfer reaction of piperazine with **W-St-Bu**.<sup>a</sup>

| [Buffer], M | [B], M  | $k_{\text{obs}}$ , s <sup>-1</sup> |
|-------------|---------|------------------------------------|
| 0.0125      | 0.00625 | 7.06 ± 0.02                        |
| 0.0250      | 0.01250 | 16.4 ± 0.1                         |
| 0.0375      | 0.01875 | 25.2 ± 0.2                         |
| 0.0500      | 0.02500 | 33.5 ± 0.1                         |
| 0.0625      | 0.03125 | 43.17 ± 0.09                       |
| 0.0750      | 0.03750 | 52.47 ± 0.09                       |
| 0.1000      | 0.05000 | 71.8 ± 0.3                         |

<sup>a</sup>Acetonitrile:Water (1:1 V/V), 25°C,  $\mu = 0.1$  M (KCl), [**W-St-Bu**] = 1.00 x 10<sup>-4</sup> M, pH = 9.97.

Monitored at 441 nm in a stopped-flow apparatus.

**Table S15.** Proton transfer reaction of HEPA with **W-St-Bu**.<sup>a</sup>

| [Buffer], M | [B], M  | $k_{\text{obs}}$ , s <sup>-1</sup> |
|-------------|---------|------------------------------------|
| 0.0125      | 0.00625 | 3.38 ± 0.01                        |
| 0.0250      | 0.01250 | 6.96 ± 0.04                        |
| 0.0375      | 0.01875 | 10.35 ± 0.04                       |
| 0.0500      | 0.02500 | 14.0 ± 0.2                         |
| 0.0625      | 0.03125 | 16.91 ± 0.09                       |
| 0.0750      | 0.03750 | 20.8 ± 0.1                         |
| 0.1000      | 0.05000 | 28.29 ± 0.09                       |

<sup>a</sup>Acetonitrile:Water (1:1 V/V), 25°C,  $\mu = 0.1$  M (KCl), [**W-St-Bu**] = 1.00 x 10<sup>-4</sup> M, pH = 9.33.

Monitored at 441nm in a stopped-flow apparatus.

**Table S16.** Proton transfer reaction of n-butylamine with **W-St-Bu**.<sup>a</sup>

| [Buffer], M | [B], M  | $k_{\text{obs}}$ , s <sup>-1</sup> |
|-------------|---------|------------------------------------|
| 0.0125      | 0.00625 | 12.57 ± 0.05                       |
| 0.0250      | 0.01250 | 26.23 ± 0.08                       |
| 0.0375      | 0.01875 | 39.96 ± 0.07                       |
| 0.0500      | 0.02500 | 54.8 ± 0.1                         |
| 0.0625      | 0.03125 | 70.7 ± 0.9                         |
| 0.0750      | 0.03750 | 87.1 ± 0.1                         |
| 0.1000      | 0.05000 | 112.7 ± 0.4                        |

<sup>a</sup>Acetonitrile:Water (1:1 V/V), 25°C,  $\mu = 0.1$  M (KCl), [**W-St-Bu**] =  $1.00 \times 10^{-4}$  M, pH = 10.40.

Monitored at 441 nm in a stopped-flow apparatus.

**Table S17.** Proton transfer reaction of MeOCH<sub>2</sub>CH<sub>2</sub>NH<sub>2</sub> with **W-St-Bu**.<sup>a</sup>

| [Buffer], M | [B], M  | $k_{\text{obs}}$ , s <sup>-1</sup> |
|-------------|---------|------------------------------------|
| 0.0125      | 0.00625 | 2.90 ± 0.01                        |
| 0.0250      | 0.01250 | 5.77 ± 0.02                        |
| 0.0375      | 0.01875 | 9.18 ± 0.03                        |
| 0.0500      | 0.02500 | 12.79 ± 0.07                       |
| 0.0625      | 0.03125 | 15.77 ± 0.09                       |
| 0.0750      | 0.03750 | 20.0 ± 0.2                         |
| 0.1000      | 0.05000 | 26.89 ± 0.09                       |

<sup>a</sup>Acetonitrile:Water (1:1 V/V), 25°C,  $\mu = 0.1$  M (KCl), [**W-St-Bu**] =  $1.00 \times 10^{-4}$  M, pH = 9.39.

Monitored at 441 nm in a stopped-flow apparatus.

**Table S18.** Proton transfer reaction of benzyamine with **W-St-Bu**.<sup>a</sup>

| [Buffer], M | [B], M  | $k_{\text{obs}}$ , s <sup>-1</sup> |
|-------------|---------|------------------------------------|
| 0.0125      | 0.00625 | 6.96 ± 0.05                        |
| 0.0250      | 0.01250 | 14.84 ± 0.07                       |
| 0.0375      | 0.01875 | 23.64 ± 0.06                       |
| 0.0500      | 0.02500 | 32.20 ± 0.05                       |
| 0.0625      | 0.03125 | 41.8 ± 0.1                         |
| 0.0750      | 0.03750 | 50.2 ± 0.3                         |
| 0.1000      | 0.05000 | 70.5 ± 0.4                         |

<sup>a</sup>Acetonitrile:Water (1:1 V/V), 25°C,  $\mu = 0.1$  M (KCl), [**W-St-Bu**] =  $1.00 \times 10^{-4}$  M, pH = 9.12.

Monitored at 441 nm in a stopped-flow apparatus.

**Table S19.** Proton transfer reaction of furfurylamine with **W-St-Bu**.<sup>a</sup>

| [Buffer], M | [B], M  | $k_{\text{obs}}$ , s <sup>-1</sup> |
|-------------|---------|------------------------------------|
| 0.0125      | 0.00625 | 5.27 ± 0.05                        |
| 0.0250      | 0.01250 | 10.73 ± 0.08                       |
| 0.0375      | 0.01875 | 15.64 ± 0.09                       |
| 0.0500      | 0.02500 | 21.4 ± 0.1                         |
| 0.0625      | 0.03125 | 26.66 ± 0.06                       |
| 0.0750      | 0.03750 | 32.4 ± 0.2                         |
| 0.1000      | 0.05000 | 43.0 ± 0.4                         |

<sup>a</sup>Acetonitrile:Water (1:1 V/V), 25°C,  $\mu = 0.1$  M (KCl), [**W-St-Bu**] =  $1.00 \times 10^{-4}$  M, pH = 8.58.

Monitored at 441 nm in a stopped-flow apparatus.

**Table S20.** Proton transfer reaction of EtOCOCH<sub>2</sub>NH<sub>2</sub> with **W-St-Bu**.<sup>a</sup>

| [Buffer], M | [HB <sup>+</sup> ], M | $k_{\text{obs}}$ , s <sup>-1</sup> |
|-------------|-----------------------|------------------------------------|
| 0.0125      | 0.00625               | 9.232 ± 0.009                      |
| 0.0250      | 0.01250               | 17.48 ± 0.04                       |
| 0.0375      | 0.01875               | 25.15 ± 0.06                       |
| 0.0500      | 0.02500               | 34.5 ± 0.6                         |
| 0.0625      | 0.03125               | 40.1 ± 0.6                         |
| 0.0750      | 0.03750               | 47.6 ± 0.3                         |
| 0.1000      | 0.05000               | 60.9 ± 0.7                         |

<sup>a</sup>Acetonitrile:Water (1:1 V/V), 25°C,  $\mu = 0.1$  M (KCl), [**W-St-Bu**] =  $1.00 \times 10^{-4}$  M, pH = 7.43.

Monitored at 441 nm in a stopped-flow apparatus.

**Table S21.** Proton transfer reaction of KOH with **W-Sc-Hex**.<sup>a</sup>

| [KHO], M <sup>b</sup> | $k_{\text{obs}}$ , s <sup>-1</sup> |
|-----------------------|------------------------------------|
| 0.0010                | 0.528 ± 0.002                      |
| 0.0025                | 1.651 ± 0.002                      |
| 0.0050                | 3.485 ± 0.009                      |
| 0.0100                | 7.41 ± 0.06                        |
| 0.0175                | 13.8 ± 0.2                         |
| 0.0250                | 19.9 ± 0.4                         |
| 0.0375                | 28.8 ± 0.4                         |

<sup>a</sup>Acetonitrile:Water (1:1 V/V), 25°C,  $\mu = 0.1$  M (KCl), [**W-Sc-Hex**] =  $1.00 \times 10^{-4}$  M. Monitored at 436 nm in a stopped-flow apparatus. <sup>b</sup> These values have been computed as  $10^{-(15,19-\text{pH})}$ .

**Table S22.** Proton transfer reaction of morpholine with **W-Sc-Hex**.<sup>a</sup>

| pH   | [Buffer], M | [MorfH <sup>+</sup> ], M | $k_{\text{obs}}$ , s <sup>-1</sup> |
|------|-------------|--------------------------|------------------------------------|
| 7.80 | 0.0250      | 0.0222                   | 18.43 ± 0.03                       |
|      | 0.0375      | 0.0333                   | 25.94 ± 0.03                       |
|      | 0.0500      | 0.0444                   | 34.96 ± 0.07                       |
|      | 0.0625      | 0.0555                   | 43.0 ± 0.2                         |
|      | 0.0750      | 0.0666                   | 51.0 ± 0.2                         |
|      | 0.0875      | 0.0777                   | 59.9 ± 0.2                         |
|      | 0.1000      | 0.0888                   | 69.4 ± 0.2                         |
| 8.30 | 0.0125      | 0.0089                   | 12.2 ± 0.1                         |
|      | 0.0250      | 0.0179                   | 16.05 ± 0.04                       |
|      | 0.0375      | 0.0268                   | 23.77 ± 0.05                       |
|      | 0.0500      | 0.0358                   | 31.2 ± 0.2                         |
|      | 0.0625      | 0.0447                   | 38.6 ± 0.2                         |
|      | 0.0750      | 0.0536                   | 46.2 ± 0.1                         |
|      | 0.1000      | 0.0715                   | 60.0 ± 0.3                         |
| 8.50 | 0.0125      | 0.0077                   | 11.50 ± 0.02                       |
|      | 0.0250      | 0.0153                   | 15.84 ± 0.05                       |
|      | 0.0375      | 0.0230                   | 22.69 ± 0.08                       |
|      | 0.0500      | 0.0307                   | 30.58 ± 0.06                       |
|      | 0.0625      | 0.0383                   | 37.8 ± 0.2                         |
|      | 0.0750      | 0.0460                   | 45.7 ± 0.3                         |
|      | 0.1000      | 0.0613                   | 59.9 ± 0.5                         |
| 8.88 | 0.0125      | 0.00498                  | 8.19 ± 0.05                        |
|      | 0.0250      | 0.00995                  | 13.0 ± 0.1                         |
|      | 0.0375      | 0.01493                  | 20.77 ± 0.07                       |
|      | 0.0500      | 0.01990                  | 29.1 ± 0.1                         |
|      | 0.0625      | 0.02488                  | 35.5 ± 0.2                         |
|      | 0.0750      | 0.02985                  | 43.4 ± 0.2                         |
|      | 0.1000      | 0.03980                  | 56.1 ± 0.4                         |
| 9.00 | 0.0125      | 0.00417                  | 10.10 ± 0.07                       |
|      | 0.0250      | 0.00835                  | 14.28 ± 0.06                       |
|      | 0.0375      | 0.01252                  | 21.4 ± 0.2                         |
|      | 0.0500      | 0.01669                  | 28.7 ± 0.1                         |
|      | 0.0625      | 0.02087                  | 36.6 ± 0.1                         |

|      |        |         |              |
|------|--------|---------|--------------|
|      | 0.0750 | 0.02504 | 43.4 ± 0.2   |
|      | 0.1000 | 0.03339 | 56.3 ± 0.4   |
| 9.27 | 0.0125 | 0.00265 | 8.22 ± 0.05  |
|      | 0.0250 | 0.00530 | 13.45 ± 0.09 |
|      | 0.0375 | 0.00795 | 20.07 ± 0.08 |
|      | 0.0500 | 0.01060 | 28.0 ± 0.1   |
|      | 0.0625 | 0.01326 | 34.28 ± 0.04 |
|      | 0.0750 | 0.01591 | 41.2 ± 0.1   |

<sup>a</sup>Acetonitrile:Water (1:1 V/V), 25°C,  $\mu = 0.1$  M (KCl), [**W-Sc-Hex**] =  $1.00 \times 10^{-4}$  M. Monitored at 436 nm in a stopped-flow apparatus.

**Table S23.** Proton transfer reaction of piperidine with **W-Sc-Hex**.<sup>a</sup>

| [Buffer], M | [B], M  | $k_{\text{obs}}$ , s <sup>-1</sup> |
|-------------|---------|------------------------------------|
| 0.0125      | 0.00625 | 36.1 ± 0.2                         |
| 0.0250      | 0.01250 | 88.0 ± 0.3                         |
| 0.0375      | 0.01875 | 127.4 ± 0.6                        |
| 0.0500      | 0.02500 | 181 ± 2                            |
| 0.0625      | 0.03125 | 229 ± 1                            |
| 0.0750      | 0.03750 | 313 ± 3                            |
| 0.1000      | 0.05000 | 457 ± 6                            |

<sup>a</sup>Acetonitrile:Water (1:1 V/V), 25°C,  $\mu = 0.1$  M (KCl), [**W-Sc-Hex**] =  $1.00 \times 10^{-4}$  M, pH = 11.01. Monitored at 436 nm in a stopped-flow apparatus.

**Table S24.** Proton transfer reaction of piperazine with **W-Sc-Hex**.<sup>a</sup>

| [Buffer], M | [B], M  | $k_{\text{obs}}$ , s <sup>-1</sup> |
|-------------|---------|------------------------------------|
| 0.0125      | 0.00625 | 7.6 ± 0.1                          |
| 0.0250      | 0.01250 | 17.97 ± 0.07                       |
| 0.0375      | 0.01875 | 28.3 ± 0.1                         |
| 0.0500      | 0.02500 | 39.0 ± 0.1                         |
| 0.0625      | 0.03125 | 49.9 ± 0.2                         |
| 0.0750      | 0.03750 | 60.0 ± 0.3                         |
| 0.1000      | 0.05000 | 87 ± 1                             |

<sup>a</sup>Acetonitrile:Water (1:1 V/V), 25°C,  $\mu = 0.1$  M (KCl), [**W-Sc-Hex**] =  $1.00 \times 10^{-4}$  M, pH = 9.97. Monitored at 436 nm in a stopped-flow apparatus.

**Table S25.** Proton transfer reaction of HEPA with **W-Sc-Hex**.<sup>a</sup>

| [Buffer], M | [B], M  | $k_{\text{obs}}$ , s <sup>-1</sup> |
|-------------|---------|------------------------------------|
| 0.0125      | 0.00625 | 4.52 ± 0.05                        |
| 0.0250      | 0.01250 | 9.1 ± 0.1                          |
| 0.0375      | 0.01875 | 14.6 ± 0.2                         |
| 0.0500      | 0.02500 | 19.1 ± 0.3                         |
| 0.0750      | 0.03750 | 29.1 ± 0.7                         |
| 0.1000      | 0.05000 | 40.2 ± 0.7                         |

<sup>a</sup>Acetonitrile:Water (1:1 V/V), 25°C,  $\mu = 0.1$  M (KCl), [**W-Sc-Hex**] = 1.00 x 10<sup>-4</sup> M, pH = 9.33.

Monitored at 436 nm in a stopped-flow apparatus.

**Table S26.** Proton transfer reaction of n-butylamine with **W-Sc-Hex**.<sup>a</sup>

| [Buffer], M | [B], M  | $k_{\text{obs}}$ , s <sup>-1</sup> |
|-------------|---------|------------------------------------|
| 0.0125      | 0.00625 | 11.75 ± 0.05                       |
| 0.0250      | 0.01250 | 24.04 ± 0.08                       |
| 0.0375      | 0.01875 | 35.62 ± 0.09                       |
| 0.0500      | 0.02500 | 51.5 ± 0.1                         |
| 0.0625      | 0.03125 | 65.6 ± 0.2                         |
| 0.0750      | 0.03750 | 81.0 ± 0.3                         |
| 0.1000      | 0.05000 | 104.6 ± 0.4                        |

<sup>a</sup>Acetonitrile:Water (1:1 V/V), 25°C,  $\mu = 0.1$  M (KCl), [**W-Sc-Hex**] = 1.00 x 10<sup>-4</sup> M, pH = 10.40.

Monitored at 436 nm in a stopped-flow apparatus.

**Table S27.** Proton transfer reaction of MeOCH<sub>2</sub>CH<sub>2</sub>NH<sub>2</sub> with **W-Sc-Hex**.<sup>a</sup>

| [Buffer], M | [B], M  | $k_{\text{obs}}$ , s <sup>-1</sup> |
|-------------|---------|------------------------------------|
| 0.0125      | 0.00625 | 2.86 ± 0.04                        |
| 0.0250      | 0.01250 | 5.61 ± 0.02                        |
| 0.0375      | 0.01875 | 9.07 ± 0.05                        |
| 0.0500      | 0.02500 | 12.42 ± 0.06                       |
| 0.0625      | 0.03125 | 15.97 ± 0.08                       |
| 0.0750      | 0.03750 | 19.44 ± 0.07                       |
| 0.1000      | 0.05000 | 26.3 ± 0.1                         |

<sup>a</sup>Acetonitrile:Water (1:1 V/V), 25°C,  $\mu = 0.1$  M (KCl), [**W-Sc-Hex**] = 1.00 x 10<sup>-4</sup> M, pH = 9.39.

Monitored at 436 nm in a stopped-flow apparatus.

**Table S28.** Proton transfer reaction of benzylamine with **W-Sc-Hex**.<sup>a</sup>

| [Buffer], M | [B], M  | $k_{\text{obs}}$ , s <sup>-1</sup> |
|-------------|---------|------------------------------------|
| 0.0125      | 0.00625 | 7.81 ± 0.04                        |
| 0.0250      | 0.01250 | 16.87 ± 0.05                       |
| 0.0375      | 0.01875 | 26.66 ± 0.05                       |
| 0.0500      | 0.02500 | 36.15 ± 0.08                       |
| 0.0625      | 0.03125 | 45.9 ± 0.2                         |
| 0.0750      | 0.03750 | 55.7 ± 0.2                         |
| 0.1000      | 0.05000 | 76.4 ± 0.3                         |

<sup>a</sup>Acetonitrile:Water (1:1 V/V), 25°C,  $\mu = 0.1$  M (KCl), [**W-Sc-Hex**] =  $1.00 \times 10^{-4}$  M, pH = 9.12.

Monitored at 436 nm in a stopped-flow apparatus.

**Table S29.** Proton transfer reaction of furfurylamine with **W-Sc-Hex**.<sup>a</sup>

| [Buffer], M | [B], M  | $k_{\text{obs}}$ , s <sup>-1</sup> |
|-------------|---------|------------------------------------|
| 0.0125      | 0.00625 | 6.3 ± 0.2                          |
| 0.0250      | 0.01250 | 12.3 ± 0.1                         |
| 0.0375      | 0.01875 | 17.7 ± 0.1                         |
| 0.0500      | 0.02500 | 24.0 ± 0.2                         |
| 0.0625      | 0.03125 | 28.7 ± 0.2                         |
| 0.0750      | 0.03750 | 35.0 ± 0.2                         |
| 0.1000      | 0.05000 | 45.1 ± 0.4                         |

<sup>a</sup>Acetonitrile:Water (1:1 V/V), 25°C,  $\mu = 0.1$  M (KCl), [**W-Sc-Hex**] =  $1.00 \times 10^{-4}$  M, pH = 8.58.

Monitored at 436 nm in a stopped-flow apparatus.

**Table S30.** Proton transfer reaction of EtOCOCH<sub>2</sub>NH<sub>2</sub> with **W-Sc-Hex**.<sup>a</sup>

| [Buffer], M | [HB <sup>+</sup> ], M | $k_{\text{obs}}$ , s <sup>-1</sup> |
|-------------|-----------------------|------------------------------------|
| 0.0125      | 0.00625               | 11.52 ± 0.05                       |
| 0.0250      | 0.01250               | 22.02 ± 0.07                       |
| 0.0375      | 0.01875               | 30.0 ± 0.1                         |
| 0.0500      | 0.02500               | 42.8 ± 0.3                         |
| 0.0625      | 0.03125               | 50.3 ± 0.1                         |
| 0.0750      | 0.03750               | 58.8 ± 0.6                         |
| 0.1000      | 0.05000               | 74.2 ± 0.4                         |

<sup>a</sup>Acetonitrile:Water (1:1 V/V), 25°C,  $\mu = 0.1$  M (KCl), [**W-Sc-Hex**] =  $1.00 \times 10^{-4}$  M, pH = 7.43.

Monitored at 436 nm in a stopped-flow apparatus.

**Table S31.** Proton transfer reaction of KOH with **W-Si-Pr**.<sup>a</sup>

| [KHO], M | $k_{\text{obs.}} \text{ s}^{-1}$ |
|----------|----------------------------------|
| 0.0010   | $0.737 \pm 0.001$                |
| 0.0025   | $2.441 \pm 0.007$                |
| 0.0050   | $5.13 \pm 0.03$                  |
| 0.0100   | $11.38 \pm 0.04$                 |
| 0.0175   | $21.2 \pm 0.2$                   |
| 0.0250   | $29.6 \pm 0.1$                   |
| 0.0375   | $45.5 \pm 0.8$                   |

<sup>a</sup>Acetonitrile:Water (1:1 V/V), 25°C,  $\mu = 0.1 \text{ M}$  (KCl),  $[\text{W-Si-Pr}] = 1.00 \times 10^{-4} \text{ M}$ . Monitored at 436 nm in a stopped-flow apparatus. <sup>b</sup> These values have been computed as  $10^{-(15,19-\text{pH})}$ .

**Table S32.** Proton transfer reaction of morpholine with **W-Si-Pr**.<sup>a</sup>

| pH   | [Buffer], M | [MorfH <sup>+</sup> ], M | $k_{\text{obs.}} \text{ s}^{-1}$ |
|------|-------------|--------------------------|----------------------------------|
| 7.80 | 0.0250      | 0.0222                   | 15.904                           |
|      | 0.0375      | 0.0333                   | 21.343                           |
|      | 0.0500      | 0.0444                   | 27.945                           |
|      | 0.0625      | 0.0555                   | 34.197                           |
|      | 0.0750      | 0.0666                   | 40.072                           |
|      | 0.0875      | 0.0777                   | 46.965                           |
|      | 0.1000      | 0.0888                   | 53.434                           |
| 8.30 | 0.0125      | 0.0089                   | 6.90                             |
|      | 0.0250      | 0.0179                   | 13.27                            |
|      | 0.0375      | 0.0268                   | 20.11                            |
|      | 0.0500      | 0.0358                   | 26.64                            |
|      | 0.0625      | 0.0447                   | 32.89                            |
|      | 0.0750      | 0.0536                   | 39.67                            |
|      | 0.1000      | 0.0715                   | 50.81                            |
| 8.5  | 0.0125      | 0.0077                   | 6.78                             |
|      | 0.0250      | 0.0153                   | 13.38                            |
|      | 0.0375      | 0.0230                   | 19.23                            |
|      | 0.0500      | 0.0307                   | 26.48                            |
|      | 0.0625      | 0.0383                   | 32.82                            |
|      | 0.0750      | 0.0460                   | 39.25                            |
|      | 0.1000      | 0.0613                   | 51.62                            |



|      |        |        |              |
|------|--------|--------|--------------|
| 8.88 | 0.0125 | 0.0050 | 6.46 ± 0.03  |
|      | 0.0250 | 0.0099 | 13.02 ± 0.09 |
|      | 0.0375 | 0.0149 | 19.1 ± 0.1   |
|      | 0.0500 | 0.0199 | 26.5 ± 0.1   |
|      | 0.0625 | 0.0249 | 33.8 ± 0.1   |
|      | 0.0750 | 0.0299 | 40.5 ± 0.3   |
|      | 0.1000 | 0.0398 | 54.7 ± 0.4   |
| 9.0  | 0.0125 | 0.0042 | 6.34 ± 0.04  |
|      | 0.0250 | 0.0083 | 13.0 ± 0.1   |
|      | 0.0375 | 0.0125 | 18.86 ± 0.08 |
|      | 0.0500 | 0.0167 | 25.82 ± 0.07 |
|      | 0.0625 | 0.0209 | 32.44 ± 0.07 |
|      | 0.0750 | 0.0250 | 38.54 ± 0.09 |
|      | 0.1000 | 0.0334 | 51.2 ± 0.2   |
| 9.27 | 0.0125 | 0.0027 | 6.10 ± 0.02  |
|      | 0.0250 | 0.0053 | 13.01 ± 0.08 |
|      | 0.0375 | 0.0080 | 19.85 ± 0.09 |
|      | 0.0500 | 0.0106 | 26.45 ± 0.09 |
|      | 0.0625 | 0.0133 | 32.47 ± 0.09 |
|      | 0.0750 | 0.0159 | 38.62 ± 0.09 |
|      | 0.1000 | 0.0212 | 49.0 ± 0.4   |
| 9.40 | 0.0125 | 0.0021 | 6.30         |
|      | 0.0250 | 0.0042 | 12.78        |
|      | 0.0375 | 0.0062 | 19.40        |
|      | 0.0500 | 0.0083 | 25.15        |
|      | 0.0625 | 0.0104 | 32.21        |
|      | 0.0750 | 0.0125 | 37.94        |
|      | 0.1000 | 0.0166 | 51.83        |

<sup>a</sup>Acetonitrile:Water (1:1 V/V), 25°C,  $\mu = 0.1$  M (KCl),  $[\mathbf{W-Si-Pr}] = 1.00 \times 10^{-4}$  M. Monitored at 436 nm in a stopped-flow apparatus.

**Table S33.** Proton transfer reaction of piperidine with **W-Si-Pr**.<sup>a</sup>

| [Buffer], M | [B], M  | $k_{\text{obs}}$ , s <sup>-1</sup> |
|-------------|---------|------------------------------------|
| 0.0125      | 0.00625 | 28.6 ± 0.4                         |
| 0.0250      | 0.01250 | 74.9 ± 0.3                         |
| 0.0375      | 0.01875 | 104.8 ± 0.8                        |
| 0.0500      | 0.02500 | 152.3 ± 0.6                        |
| 0.0625      | 0.03125 | 198 ± 1                            |
| 0.0750      | 0.03750 | 246 ± 2                            |
| 0.1000      | 0.05000 | 336 ± 2                            |

<sup>a</sup>Acetonitrile:Water (1:1 V/V), 25°C,  $\mu = 0.1$  M (KCl), **[W-Si-Pr]** = 1.00 x 10<sup>-4</sup> M, pH = 11.01.

Monitored at 436 nm in a stopped-flow apparatus.

**Table S34.** Proton transfer reaction of piperazine with **W-Si-Pr**.<sup>a</sup>

| [Buffer], M | [B], M  | $k_{\text{obs}}$ , s <sup>-1</sup> |
|-------------|---------|------------------------------------|
| 0.0125      | 0.00625 | 8.05 ± 0.09                        |
| 0.0250      | 0.01250 | 19.24 ± 0.08                       |
| 0.0375      | 0.01875 | 29.1 ± 0.2                         |
| 0.0500      | 0.02500 | 40.7 ± 0.2                         |
| 0.0625      | 0.03125 | 52.1 ± 0.1                         |
| 0.0750      | 0.03750 | 65.1 ± 0.4                         |
| 0.1000      | 0.05000 | 92 ± 1                             |

<sup>a</sup>Acetonitrile:Water (1:1 V/V), 25°C,  $\mu = 0.1$  M (KCl), **[W-Si-Pr]** = 1.00 x 10<sup>-4</sup> M, pH = 9.97.

Monitored at 436 nm in a stopped-flow apparatus.

**Table S35.** Proton transfer reaction of HEPA with **W-Si-Pr**.<sup>a</sup>

| [Buffer], M | [B], M  | $k_{\text{obs}}$ , s <sup>-1</sup> |
|-------------|---------|------------------------------------|
| 0.0125      | 0.00625 | 4.59 ± 0.01                        |
| 0.0250      | 0.01250 | 10.1 ± 0.2                         |
| 0.0375      | 0.01875 | 14.41 ± 0.09                       |
| 0.0500      | 0.02500 | 19.76 ± 0.08                       |
| 0.0625      | 0.03125 | 24.45 ± 0.03                       |
| 0.0750      | 0.03750 | 29.26 ± 0.07                       |
| 0.1000      | 0.05000 | 40.14 ± 0.07                       |

<sup>a</sup>Acetonitrile:Water (1:1 V/V), 25°C,  $\mu = 0.1$  M (KCl), **[W-Si-Pr]** = 1.00 x 10<sup>-4</sup> M, pH = 9.33.

Monitored at 436 nm in a stopped-flow apparatus.

**Table S36.** Proton transfer reaction of n-butylamine with **W-Si-Pr**.<sup>a</sup>

| [Buffer], M | [HB <sup>+</sup> ], M | $k_{\text{obs}}$ , s <sup>-1</sup> |
|-------------|-----------------------|------------------------------------|
| 0.0125      | 0.00625               | 11.64 ± 0.06                       |
| 0.0250      | 0.01250               | 24.4 ± 0.2                         |
| 0.0375      | 0.01875               | 36.9 ± 0.2                         |
| 0.0500      | 0.02500               | 51.0 ± 0.7                         |
| 0.0625      | 0.03125               | 62.8 ± 0.2                         |
| 0.0750      | 0.03750               | 80.2 ± 0.7                         |
| 0.1000      | 0.05000               | 99.9 ± 0.3                         |

<sup>a</sup>Acetonitrile:Water (1:1 V/V), 25°C,  $\mu = 0.1$  M (KCl), [**W-Si-Pr**] = 1.00 x 10<sup>-4</sup> M, pH = 10.40.

Monitored at 436 nm in a stopped-flow apparatus.

**Table S37.** Proton transfer reaction of MeOCH<sub>2</sub>CH<sub>2</sub>NH<sub>2</sub> with **W-Si-Pr**.<sup>a</sup>

| [Buffer], M | [B], M  | $k_{\text{obs}}$ , s <sup>-1</sup> |
|-------------|---------|------------------------------------|
| 0.0125      | 0.00625 | 2.79 ± 0.01                        |
| 0.0250      | 0.01250 | 5.71 ± 0.03                        |
| 0.0375      | 0.01875 | 9.02 ± 0.04                        |
| 0.0500      | 0.02500 | 12.28 ± 0.09                       |
| 0.0625      | 0.03125 | 15.30 ± 0.07                       |
| 0.0750      | 0.03750 | 19.08 ± 0.03                       |
| 0.1000      | 0.05000 | 26.0 ± 0.1                         |

<sup>a</sup>Acetonitrile:Water (1:1 V/V), 25°C,  $\mu = 0.1$  M (KCl), [**W-Si-Pr**] = 1.00 x 10<sup>-4</sup> M, pH = 9.39.

Monitored at 436 nm in a stopped-flow apparatus.

**Table S38.** Proton transfer reaction of benzylamine with **W-Si-Pr**.<sup>a</sup>

| [Buffer], M | [HB <sup>+</sup> ], M | $k_{\text{obs}}$ , s <sup>-1</sup> |
|-------------|-----------------------|------------------------------------|
| 0.0125      | 0.00625               | 6.64 ± 0.05                        |
| 0.0250      | 0.01250               | 14.43 ± 0.06                       |
| 0.0375      | 0.01875               | 23.1 ± 0.1                         |
| 0.0500      | 0.02500               | 32.3 ± 0.3                         |
| 0.0625      | 0.03125               | 40.5 ± 0.2                         |
| 0.0750      | 0.03750               | 49.7 ± 0.4                         |
| 0.1000      | 0.05000               | 68.8 ± 0.3                         |

<sup>a</sup>Acetonitrile:Water (1:1 V/V), 25°C,  $\mu = 0.1$  M (KCl), [**W-Si-Pr**] = 1.00 x 10<sup>-4</sup> M, pH = 9.12.

Monitored at 436 nm in a stopped-flow apparatus.

**Table S39.** Proton transfer reaction of furfurilamine with **W-Si-Pr**.<sup>a</sup>

| [Buffer], M | [HB <sup>+</sup> ], M | $k_{\text{obs}}$ , s <sup>-1</sup> |
|-------------|-----------------------|------------------------------------|
| 0.0125      | 0.00625               | 5.22 ± 0.09                        |
| 0.0250      | 0.01250               | 10.41 ± 0.08                       |
| 0.0375      | 0.01875               | 15.52 ± 0.07                       |
| 0.0500      | 0.02500               | 21.6 ± 0.3                         |
| 0.0625      | 0.03125               | 26.50 ± 0.04                       |
| 0.0750      | 0.03750               | 31.7 ± 0.1                         |
| 0.1000      | 0.05000               | 41.1 ± 0.2                         |

<sup>a</sup>Acetonitrile:Water (1:1 V/V), 25°C,  $\mu = 0.1$  M (KCl), [**W-Si-Pr**] =  $1.00 \times 10^{-4}$  M, pH = 8.58.

Monitored at 436 nm in a stopped-flow apparatus.

**Table S40.** Proton transfer reaction of EtOCOCH<sub>2</sub>NH<sub>2</sub> with **W-Si-Pr**.<sup>a</sup>

| [Buffer], M | [HB <sup>+</sup> ], M | $k_{\text{obs}}$ , s <sup>-1</sup> |
|-------------|-----------------------|------------------------------------|
| 0.0125      | 0.00625               | 8.93 ± 0.03                        |
| 0.0250      | 0.01250               | 17.00 ± 0.04                       |
| 0.0375      | 0.01875               | 23.42 ± 0.08                       |
| 0.0500      | 0.02500               | 32.55 ± 0.08                       |
| 0.0625      | 0.03125               | 39.75 ± 0.09                       |
| 0.0750      | 0.03750               | 46.5 ± 0.2                         |
| 0.1000      | 0.05000               | 58.1 ± 0.2                         |

<sup>a</sup>Acetonitrile:Water (1:1 V/V), 25°C,  $\mu = 0.1$  M (KCl), [**W-Si-Pr**] =  $1.00 \times 10^{-4}$  M, pH = 7.43.

Monitored at 436 nm in a stopped-flow apparatus.

Cartesian coordinates (in Å) and total energy (in a. u. non corrected zero-point vibrational energies included) of all the stationary points discussed in the text in gas phase. All calculation have been performed at the B3LYP/LANLDZ&6-31+G(d) level of theory.

### Cr-SMe

E = -1169.1218991

C 1.27042200 0.51168100 -0.00287400  
S 2.45683400 -0.70810800 -0.00019100  
C 1.77176100 1.93336600 -0.00297200  
C 4.13423600 0.04782800 -0.00098700  
H 2.37407000 2.13532800 0.89526000  
H 2.42527400 2.12626600 -0.86619500  
H 0.95480100 2.65572200 -0.02881500  
H 4.83560300 -0.79084100 0.00964300  
H 4.30307500 0.64331300 -0.90213300  
H 4.29620900 0.66067000 0.88965400  
Cr -0.70933900 -0.03148300 0.00001900  
C -1.00204100 1.29103300 1.34378100  
O -1.18445000 2.08764200 2.15906900  
C -2.56491200 -0.43556300 0.00214800  
O -3.69532800 -0.67245100 0.00335200  
C -0.40908600 -1.34199400 1.36133100  
O -0.23692400 -2.13001000 2.18492200  
C -0.99657600 1.26439900 -1.37064600  
O -1.17436900 2.04557700 -2.20170000  
C -0.40913000 -1.36970000 -1.33419600  
O -0.23921300 -2.17468800 -2.14168600

### Cr-SMe<sup>-</sup>

E = -1168.60427

C 1.29396700 0.63154700 -0.06561400  
S 2.45809600 -0.71653700 -0.01352000  
C 1.72966600 1.90832600 -0.12908100  
C 4.13812000 0.02016100 -0.06507800  
H 2.78140000 2.20207100 -0.15252000  
H 1.02212100 2.73531000 -0.16091500  
H 4.84679200 -0.81464200 -0.03335800  
H 4.29894600 0.59006600 -0.98757500  
H 4.31761900 0.67363600 0.79654000  
Cr -0.80721200 -0.05160400 -0.01572800

C -1.03886000 1.29052000 1.29552000  
O -1.18248000 2.11448000 2.10080300  
C -2.59287700 -0.51789700 0.02148600  
O -3.72896100 -0.80110100 0.04461700  
C -0.41266300 -1.28909300 1.37026300  
O -0.23749000 -2.04577000 2.23305200  
C -1.08703100 1.21362700 -1.39220300  
O -1.26377500 1.98964100 -2.23762400  
C -0.43743300 -1.36023700 -1.34132000  
O -0.27109900 -2.15984700 -2.16622300

### **Cr-Si-Pr**

E= -1247.7510433

C -0.71581700 0.54796500 -0.31195000  
S -1.95340000 -0.56030500 0.02782500  
C -1.08539800 1.92055400 -0.81018300  
C -3.66393600 0.13313300 -0.28646800  
C -4.10599300 1.07504700 0.83726400  
C -4.59285700 -1.07886400 -0.43219800  
Cr 1.23683200 -0.04986300 0.02380500  
C 1.56376300 0.30069700 -1.82254100  
O 1.74597000 0.52006200 -2.94133500  
C 3.05234500 -0.51796800 0.29981700  
O 4.16173400 -0.79612600 0.46482500  
C 0.86580100 -1.88019300 -0.39755100  
O 0.69157500 -2.99148400 -0.65196300  
C 1.68495800 1.74739300 0.46676400  
O 1.98238000 2.82812500 0.74621400  
C 0.81420700 -0.39642300 1.85541600  
O 0.54227900 -0.60017500 2.95744600  
H -2.04227400 1.98590800 -1.33974800  
H -1.14739200 2.59105300 0.06053500  
H -0.29983300 2.32582600 -1.45309500  
H -3.62640900 0.66872500 -1.24078500  
H -3.44982100 1.94576100 0.93041300  
H -4.11854100 0.55499100 1.80206200  
H -5.12170400 1.43958800 0.63596700  
H -5.61457700 -0.73387300 -0.63234400  
H -4.61687700 -1.67762800 0.48618500  
H -4.28607600 -1.73000500 -1.25744600

### **Cr-Si-Pr**

E= -1247.2328809

C -0.70748500 0.61321900 -0.37573800  
S -1.94132100 -0.55541300 0.17061100  
C -1.04900500 1.76882600 -0.98463200  
C -3.62703200 0.13088300 -0.19583100  
C -4.04767500 1.20353900 0.81646300  
C -4.61697100 -1.04045200 -0.22059300  
Cr 1.34884300 -0.08597000 0.05227600  
C 1.73906200 0.46834200 -1.71235000  
O 1.98385100 0.80713300 -2.79559500  
C 3.10112000 -0.57461800 0.36553400  
O 4.21664500 -0.87356800 0.55893400  
C 0.93425600 -1.81349800 -0.62044100  
O 0.74388300 -2.87825000 -1.04166000  
C 1.63337200 1.66994500 0.69293800  
O 1.80989300 2.74750400 1.08756200  
C 0.84650800 -0.60830900 1.80873300  
O 0.60425100 -0.92415800 2.89904200  
H -2.07366100 2.09173200 -1.18211900  
H -0.28087800 2.46000600 -1.32778400  
H -3.58132700 0.57133500 -1.19975000  
H -3.31087700 2.01078800 0.87114300  
H -4.14154800 0.76687400 1.81887500  
H -5.02034700 1.64063000 0.54009700  
H -5.63503300 -0.67805400 -0.42575200  
H -4.63658900 -1.55964200 0.74683000  
H -4.34872400 -1.77280900 -0.99011300

### **Cr-Sn-Bu**

E= -1287.0655851

C 0.16458400 0.71753800 -0.00016400  
S 1.50540600 -0.32841400 -0.00013700  
C 0.46387400 2.19562800 -0.00016500  
C 3.08494200 0.64058900 -0.00007600  
C 4.27108000 -0.33037100 0.00002900  
C 5.62078600 0.40535500 0.00003500  
Cr -1.72739900 -0.09072200 0.00001000  
C -2.19422500 1.16700700 1.35604000  
O -2.48126600 1.92459000 2.17863500  
C -3.50793200 -0.74742900 0.00020300  
O -4.59476400 -1.13921500 0.00031500

C -1.24546900 -1.35822400 1.34901800  
O -0.96407700 -2.12144000 2.16612700  
C -2.19394700 1.16597600 -1.35708700  
O -2.48075900 1.92295900 -2.18031300  
C -1.24549000 -1.35935100 -1.34795700  
O -0.96421800 -2.12327900 -2.16444000  
C 6.81717300 -0.55394400 0.00003200  
H 1.05802200 2.47810500 0.88116300  
H 1.05961900 2.47804600 -0.88041700  
H -0.44599800 2.79742500 -0.00095800  
H 3.10674800 1.28185200 -0.88805500  
H 3.10661600 1.28189200 0.88787500  
H 4.21117700 -0.98464400 -0.88041000  
H 4.21111600 -0.98453500 0.88054500  
H 5.67664600 1.06207800 0.87989500  
H 5.67665100 1.06209100 -0.87981600  
H 6.80700800 -1.20125700 -0.88582700  
H 6.80696300 -1.20132500 0.88584000  
H 7.76494700 -0.00334600 0.00007900

### **Cr-Sn-Bu<sup>-</sup>**

E= -1286.5467661

C 0.16495300 0.84223400 -0.04630700  
S 1.50288300 -0.33568500 -0.02108200  
C 0.41741300 2.16880200 -0.07666600  
C 3.07858400 0.61988100 -0.04255000  
C 4.27701200 -0.33459300 -0.02019300  
C 5.62779100 0.39832200 -0.03702000  
Cr -1.82339600 -0.12417900 -0.02116200  
C -2.25582900 1.16737600 1.28994000  
O -2.52447900 1.95969100 2.09499400  
C -3.52804500 -0.83249500 -0.00134200  
O -4.61423900 -1.26988600 0.01128500  
C -1.26827900 -1.29652500 1.36622100  
O -0.98997700 -2.02085700 2.22960600  
C -2.25593200 1.09703700 -1.39806300  
O -2.52432300 1.84589400 -2.24376500  
C -1.27048400 -1.36788500 -1.34587300  
O -0.99414200 -2.13691600 -2.17037000  
C 6.83044400 -0.55439000 -0.01433400  
H 1.41635900 2.60954600 -0.08778900  
H -0.40054100 2.88739500 -0.09198800  
H 3.10847500 1.24742800 -0.94305500



H 3.10759600 1.28776600 0.82846200  
H 4.22029900 -1.01174600 -0.88455700  
H 4.21990900 -0.97079700 0.87471500  
H 5.68337100 1.07739900 0.82654300  
H 5.68388300 1.03596600 -0.93159400  
H 6.81941500 -1.22523700 -0.88356800  
H 6.81991300 -1.18269500 0.88615300  
H 7.78116100 -0.00532100 -0.02778400

### **Cr-St-Bu**

E= -1287.0611138

C -0.52794100 0.60225300 0.03618600  
S -1.72583200 -0.59221800 -0.00718900  
C -0.89565900 2.06288400 0.05319200  
C -3.54756000 -0.02924000 0.00432100  
C -3.93160100 0.56974200 1.36545500  
C -4.28020000 -1.37032600 -0.19507800  
Cr 1.44427800 -0.05178100 -0.00144900  
C 1.90100000 1.49043900 -1.02149900  
O 2.20271700 2.41366900 -1.64699100  
C 3.27086000 -0.55086700 -0.02318800  
O 4.38803200 -0.84686000 -0.03521800  
C 1.10872200 -1.01661500 -1.61744700  
O 0.89250300 -1.59367300 -2.59221100  
C 1.69334700 0.91498500 1.62325100  
O 1.83226100 1.50531100 2.60593000  
C 1.05621700 -1.63073200 1.00922900  
O 0.86751700 -2.58787700 1.62424400  
C -3.86664800 0.91330100 -1.16417700  
H -0.95388200 2.40635000 -0.99097900  
H -1.85092200 2.29773300 0.52907700  
H -0.11117100 2.65670400 0.52879300  
H -3.43754400 1.52445400 1.56597300  
H -3.68988000 -0.11626300 2.18423400  
H -5.01492200 0.75036600 1.38608200  
H -5.36269800 -1.19112800 -0.18646400  
H -4.05102200 -2.08260600 0.60552100  
H -4.02202700 -1.83546000 -1.15287200  
H -4.95225700 1.07545200 -1.20550400  
H -3.55732600 0.48070400 -2.12191200  
H -3.39320400 1.89244900 -1.05964900

### **Cr-St-Bu<sup>-</sup>**

E= -1286.5428524

C -0.56424500 0.72477900 0.13491700  
S -1.73308200 -0.59537300 -0.11037900  
C -0.90075200 2.01333100 0.35516100  
C -3.54194200 -0.06167400 -0.03297700  
C -3.90733000 0.49496000 1.35273300  
C -4.31347600 -1.37346900 -0.26718800  
Cr 1.51282200 -0.06349500 0.02399700  
C 1.85800400 1.45194800 -1.05224500  
O 2.07799400 2.37936000 -1.71522800  
C 3.27651800 -0.60143000 -0.04661000  
O 4.39954800 -0.93023200 -0.08884900  
C 1.09992900 -1.04279500 -1.55136800  
O 0.91280100 -1.64158000 -2.52784100  
C 1.79859400 0.94892400 1.59506500  
O 1.97839500 1.56762500 2.56087000  
C 1.06424000 -1.55655500 1.11165000  
O 0.86129400 -2.47595700 1.79037300  
C -3.88630800 0.93098000 -1.15543500  
H -1.91928400 2.39737100 0.40763500  
H -0.12631100 2.76556400 0.49708200  
H -3.33894400 1.39530500 1.59902200  
H -3.70234000 -0.24882600 2.13120000  
H -4.97967300 0.74578700 1.38984800  
H -5.39627500 -1.17877500 -0.24369700  
H -4.08281500 -2.11488200 0.50712700  
H -4.06641800 -1.81209400 -1.24137600  
H -4.95849500 1.18305200 -1.12294200  
H -3.66717900 0.49312800 -2.13601500  
H -3.31623200 1.85982400 -1.07388900

### **Cr-Sc-Hex**

E = -1364.4888128

C 0.06963500 0.40195200 0.40248600  
S -1.13761200 -0.58571800 -0.26895400  
C -0.36853100 1.51763700 1.31976800  
C -2.85100600 -0.05020700 0.24537600  
C -3.72604100 -1.31483900 0.31988300  
C -5.17712900 -0.95503600 0.68880900  
C -5.77032000 0.08098200 -0.27825500  
Cr 2.04165000 -0.02247500 -0.03223800

C 2.25570000 1.81849700 -0.48254300  
O 2.38300500 2.93334600 -0.75487200  
C 3.87841800 -0.33611800 -0.38377400  
O 4.99956200 -0.52135000 -0.59365300  
C 1.63124900 -0.41679800 -1.85881900  
O 1.40707200 -0.65268300 -2.96506800  
C 2.47220900 0.34762100 1.78764500  
O 2.74664000 0.56358200 2.88846800  
C 1.78093400 -1.86423900 0.41134100  
O 1.62171900 -2.97340900 0.68324200  
C -4.88699200 1.33541400 -0.36138000  
C -3.43538600 0.98118800 -0.73491800  
H -1.22003600 2.09018000 0.93281900  
H -0.68166900 1.08716100 2.28365700  
H 0.44786400 2.21114200 1.52820400  
H -2.77269200 0.38482500 1.24793100  
H -3.30924700 -2.01879100 1.05028600  
H -3.71358200 -1.82423500 -0.65478500  
H -5.78758600 -1.86689300 0.69685800  
H -5.20107900 -0.55408600 1.71334000  
H -5.86051600 -0.36635800 -1.27951300  
H -6.78597500 0.35338600 0.03570700  
H -5.29103700 2.04214500 -1.09733900  
H -4.89759300 1.85462500 0.60891100  
H -2.81490700 1.88537300 -0.75769500  
H -3.41016500 0.56019600 -1.75006600

### **Cr-Sc-Hex<sup>-</sup>**

E= -1363.9696918

C 0.05380100 0.48581100 0.47995500  
S -1.12167500 -0.69034000 -0.17253100  
C -0.34321400 1.55399000 1.20362000  
C -2.83226300 -0.15655600 0.29926900  
C -3.75758500 -1.38555000 0.26909700  
C -5.20577400 -1.01327700 0.63794900  
C -5.75138200 0.11545300 -0.25237100  
Cr 2.13882200 -0.04812800 -0.03531400  
C 2.32575000 1.77823100 -0.48644100  
O 2.44413500 2.89929600 -0.76433600  
C 3.91049900 -0.40554300 -0.41135100  
O 5.03751300 -0.62244800 -0.64338000  
C 1.64079900 -0.40626800 -1.83342000  
O 1.39986800 -0.61628000 -2.94926300

C 2.51836700 0.33731900 1.77626100  
O 2.75564000 0.57318800 2.88804900  
C 1.82951900 -1.85838300 0.45155000  
O 1.70561900 -2.97120000 0.75740200  
C -4.82291000 1.34081900 -0.23036800  
C -3.37982800 0.95848500 -0.60810600  
H -1.38177200 1.79705400 1.43923100  
H 0.38962800 2.25029300 1.60798800  
H -2.78015500 0.20961200 1.33423500  
H -3.37537500 -2.15394400 0.95243900  
H -3.74109400 -1.82601500 -0.73982000  
H -5.85154500 -1.90069600 0.56657900  
H -5.23648700 -0.68798000 1.68965900  
H -5.83653200 -0.25181700 -1.28726800  
H -6.76628600 0.39526500 0.06601700  
H -5.19940600 2.11552100 -0.91396100  
H -4.83201400 1.78397500 0.77797100  
H -2.72203900 1.83337600 -0.56257800  
H -3.35603400 0.60257500 -1.64872500

## W-SMe

E= -1150.6912223

C -1.34821700 0.53027000 -0.00004300  
C -1.84725900 1.95412100 0.00066600  
H -2.47414500 2.15478300 -0.88053100  
H -2.47418200 2.15382000 0.88206100  
H -1.02496300 2.67117000 0.00108600  
S -2.54067000 -0.69065100 -0.00109100  
C -4.21257200 0.07497800 -0.00104600  
H -4.91877700 -0.75972600 -0.00153900  
H -4.37527400 0.67950300 0.89516900  
H -4.37496400 0.68028800 -0.89678900  
C 2.76099600 -0.48634400 0.00001400  
O 3.89142500 -0.73134200 -0.00002400  
C 0.42353200 -1.47647200 1.44320800  
O 0.24274900 -2.28416100 2.24773100  
C 1.08222900 1.38393500 1.45254900  
O 1.27489300 2.18322800 2.26476300  
C 1.08240100 1.38465600 -1.45166200  
O 1.27517800 2.18436900 -2.26343200  
C 0.42325900 -1.47571900 -1.44373300  
O 0.24222600 -2.28296700 -2.24864600  
W 0.75152200 -0.03885500 0.00007600

### W-SMe<sup>-</sup>

E= -1150.174732

C -1.37227900 0.64976700 0.06028700  
C -1.81157000 1.92799100 0.09220300  
H -2.86313200 2.22179300 0.11094800  
H -1.10245100 2.75438500 0.10081400  
S -2.53945600 -0.70112800 0.04635100  
C -4.21771300 0.03834600 0.08165000  
H -4.92784300 -0.79565200 0.07159600  
H -4.37660700 0.63124100 0.98986900  
H -4.39702500 0.67031300 -0.79587300  
C 2.77309300 -0.57047200 -0.01675400  
O 3.90801800 -0.86692600 -0.03741400  
C 0.45369200 -1.46426900 1.45501800  
O 0.28807500 -2.26818200 2.27750400  
C 1.17995600 1.32836800 1.49552800  
O 1.38385200 2.10981500 2.33138700  
C 1.14378000 1.39266300 -1.40392800  
O 1.32706400 2.21049800 -2.20916200  
C 0.41799400 -1.40012900 -1.46848800  
O 0.23200200 -2.16747600 -2.32099000  
W 0.83408100 -0.04684500 0.01877100

### W-Si-Pr

E= -1229.3204093

C -0.75930800 0.44969000 0.38273700  
C 3.29291200 -0.51575900 -0.39463700  
O 4.40889700 -0.75607600 -0.58342500  
C 1.69059500 -0.04624300 1.97441400  
O 1.91226400 -0.02658700 3.10890000  
C 1.74696800 1.92913300 -0.15453500  
O 1.99632200 3.05652300 -0.20948300  
C 0.94275600 -0.13383800 -2.07782900  
O 0.74137300 -0.16776500 -3.21410300  
C 0.87104900 -2.09394100 0.04161700  
O 0.62265400 -3.22033000 0.08803000  
C -1.16192000 1.47520100 1.41663700  
H -1.62188800 0.96920700 2.27925600  
H -0.29767200 2.02900100 1.78705000  
H -1.89798100 2.19638700 1.03968600  
S -2.00662500 -0.35888700 -0.45029400

C -3.69736100 0.25724200 0.06451400  
H -3.62632700 0.55389300 1.11516600  
C -4.13020100 1.44967600 -0.79608300  
H -5.12382200 1.79361100 -0.48051700  
H -3.43878000 2.29448800 -0.71316400  
H -4.19025200 1.16745100 -1.85349500  
C -4.66081700 -0.92954200 -0.06033700  
H -4.36890500 -1.75980100 0.59090900  
H -5.67217300 -0.61191500 0.22182600  
H -4.70448300 -1.30224900 -1.09080400  
W 1.31259100 -0.08097600 -0.04917400

### **W-Si-Pr<sup>-</sup>**

E= -1228.8032269

C -0.78456700 0.58728000 0.42602100  
C 3.28772400 -0.58259100 -0.43811200  
O 4.40432300 -0.87371700 -0.64951500  
C 1.73859300 0.01940900 1.94895900  
O 1.94589000 0.07384100 3.09121000  
C 1.83694100 1.91495000 -0.24578600  
O 2.10798100 3.04072600 -0.34778600  
C 0.93778100 -0.13088500 -2.06894700  
O 0.73030400 -0.15922800 -3.21173700  
C 0.88080800 -2.05452600 0.13356800  
O 0.65451300 -3.18827100 0.24964700  
C -1.13942100 1.60960800 1.23574900  
H -0.37607700 2.20429400 1.73528700  
H -2.16716300 1.90716400 1.45355100  
S -2.01476100 -0.42857000 -0.38356300  
C -3.70291600 0.19811600 0.06573100  
H -3.68003700 0.43270000 1.13752200  
C -4.08510200 1.45526800 -0.72546900  
H -5.06119000 1.84283900 -0.39311800  
H -3.33999700 2.24674200 -0.59971300  
H -4.15460200 1.22690600 -1.79656800  
C -4.70509300 -0.94000200 -0.16519400  
H -4.46721300 -1.81245400 0.45338400  
H -5.72500800 -0.60852700 0.07899400  
H -4.70133000 -1.26039400 -1.21549500  
W 1.38137100 -0.07229000 -0.06501300

### **W-Sn-Bu**

E= -1268.634833

C -0.21770100 0.73705400 -0.00107500  
C 3.72554500 -0.80871800 0.00197400  
O 4.81409200 -1.20085500 0.00281800  
C 1.27795600 -1.47783300 1.44672400  
O 0.99067500 -2.25158300 2.25394000  
C 2.30696300 1.26872100 1.45052800  
O 2.60220300 2.03764000 2.26158300  
C 2.30778600 1.26424500 -1.45351200  
O 2.60360700 2.03060300 -2.26678100  
C 1.27841900 -1.48204500 -1.44195300  
O 0.99128000 -2.25806900 -2.24703000  
C -0.52210700 2.21538100 -0.00333900  
H -1.11756500 2.49626100 -0.88418300  
H -1.11583300 2.49906700 0.87779300  
H 0.38946700 2.81505800 -0.00513100  
S -1.55860400 -0.31647000 0.00066300  
C -3.13695700 0.65282300 -0.00065600  
H -3.15867000 1.29543800 0.88630400  
H -3.15908600 1.29245400 -0.88976400  
C -4.32393800 -0.31723600 0.00122300  
H -4.26434400 -0.97007000 0.88274300  
H -4.26483600 -0.97286700 -0.87825200  
C -5.67284500 0.41997000 0.00043700  
H -5.72815700 1.07543200 -0.88038600  
H -5.72773400 1.07806300 0.87932200  
C -6.87037700 -0.53790500 0.00214100  
H -6.86078400 -1.18393700 0.88893300  
H -7.81748600 0.01382600 0.00153800  
H -6.86118200 -1.18656200 -0.88273500  
W 1.79360800 -0.10074000 0.00046500

### **W-Sn-Bu<sup>-</sup>**

E= -1268.1171477

C -0.21914800 0.86670600 -0.05132800  
C 3.72581900 -0.89885200 0.00556700  
O 4.81071200 -1.34505700 0.02067800  
C 1.29041400 -1.40605900 1.46948600  
O 1.00930400 -2.14228500 2.32339100  
C 2.38033300 1.26536400 1.40027000  
O 2.67432700 2.05170100 2.20406100  
C 2.39711100 1.19643200 -1.49922000  
O 2.70247700 1.94247300 -2.33655600

C 1.29805500 -1.46995000 -1.45538600  
O 1.01890400 -2.24165700 -2.27801800  
C -0.47975300 2.19295100 -0.08947200  
H -1.48017700 2.62973700 -0.10228800  
H 0.33710200 2.91289900 -0.11005400  
S -1.55636700 -0.31720500 -0.01812700  
C -3.13409000 0.63344500 -0.04374200  
H -3.16451100 1.30530900 0.82414200  
H -3.16566500 1.25662900 -0.94719300  
C -4.33069800 -0.32334500 -0.01672600  
H -4.27163700 -0.95606800 0.88049700  
H -4.27344200 -1.00355000 -0.87862300  
C -5.68264500 0.40733900 -0.03505200  
H -5.74030800 1.04208600 -0.93157300  
H -5.73880900 1.08897800 0.82643500  
C -6.88367200 -0.54729900 -0.00871600  
H -6.87154300 -1.17293100 0.89359200  
H -7.83522500 0.00023300 -0.02309700  
H -6.87220200 -1.22062000 -0.87600900  
W 1.87456200 -0.11932400 -0.02040000

### **W-St-Bu**

E= -1268.6300525

C -0.57309600 0.59691800 0.11619800  
C 3.49737400 -0.60867800 -0.04283500  
O 4.61647900 -0.90239400 -0.07695500  
C 1.05108300 -1.93710800 0.77069800  
O 0.81498300 -2.98678300 1.19042000  
C 1.76420000 0.65198000 1.93159200  
O 1.89874800 1.06687500 3.00204200  
C 2.02872600 1.76583600 -0.74261400  
O 2.33482100 2.79493700 -1.17329000  
C 1.22544400 -0.80714300 -1.88564100  
O 1.04762700 -1.21950100 -2.94915500  
C -0.94832100 2.02961900 0.40146100  
H -0.98247500 2.56680600 -0.55854100  
H -1.91641500 2.16714500 0.88903900  
H -0.17816200 2.51865500 1.00301700  
S -1.77157200 -0.56485600 -0.19921100  
C -3.58983700 0.00275200 -0.13186400  
C -4.32156400 -1.26784600 -0.60683000  
H -5.40329700 -1.08441600 -0.59212800  
H -4.03915800 -1.54058100 -1.62970700



H -4.11706800 -2.12386000 0.04604300  
C -4.01254400 0.33340900 1.30748200  
H -3.52143700 1.22810200 1.70035800  
H -5.09550700 0.51527300 1.33124800  
H -3.79643300 -0.49838500 1.98629700  
C -3.86937700 1.15478700 -1.10670900  
H -4.95299800 1.32751300 -1.15518000  
H -3.40155000 2.09228300 -0.79723800  
H -3.52356300 0.91403100 -2.11788000  
W 1.51671500 -0.07362400 0.02021400

### **W-St-Bu<sup>-</sup>**

E= -1268.113022

C -0.61299900 0.69835200 0.25073800  
C 3.48694700 -0.65955500 -0.08542400  
O 4.61013200 -0.98996200 -0.15999500  
C 1.06080900 -1.85746000 0.93813000  
O 0.81856200 -2.87094800 1.45172700  
C 1.90797800 0.72462900 1.90238300  
O 2.11291600 1.17874800 2.95255300  
C 1.99792400 1.72392400 -0.82414400  
O 2.24610800 2.74616500 -1.31820800  
C 1.19067300 -0.86395800 -1.80963100  
O 1.03334800 -1.31122600 -2.87031400  
C -0.96273800 1.91506500 0.72327200  
H -1.98299100 2.28394800 0.82137400  
H -0.19358500 2.61610400 1.04415400  
S -1.77586900 -0.53670800 -0.30467300  
C -3.58612000 -0.02064600 -0.18269100  
C -4.34464600 -1.24911200 -0.71858700  
H -5.42833700 -1.06055200 -0.68971000  
H -4.06403400 -1.46935700 -1.75549500  
H -4.13673600 -2.14012600 -0.11418300  
C -4.00451100 0.23116800 1.27510700  
H -3.44582700 1.05402400 1.72790700  
H -5.07737900 0.47707600 1.32396100  
H -3.82996200 -0.66277500 1.88467700  
C -3.89278400 1.18887500 -1.08117700  
H -4.96846600 1.42467600 -1.04332300  
H -3.33862800 2.08054800 -0.77742900  
H -3.62619000 0.97160900 -2.12179400  
W 1.57070500 -0.07758500 0.04966600

## W-Sc-Hex

E= -1346.0579164

C -0.03051400 0.28553600 0.47009900  
C -4.11595800 -0.29868700 -0.49357900  
O -5.23990700 -0.43653800 -0.73225400  
C -1.81658300 -2.08275600 -0.18845900  
O -1.63965000 -3.22095600 -0.26428700  
C -1.70274600 0.10208000 -2.07324400  
O -1.47910300 0.18104400 -3.20332300  
C -2.41126000 1.98992100 0.05572200  
O -2.57672500 3.13182400 0.12489100  
C -2.55827500 -0.21468100 1.94457900  
O -2.81610600 -0.31008400 3.06778300  
C 0.40995800 1.10753000 1.65878800  
H -0.42678400 1.65417800 2.09706900  
H 0.81029600 0.44102900 2.43800500  
H 1.20248100 1.82530100 1.41354000  
S 1.18308200 -0.44593000 -0.47522100  
C 2.89347300 -0.01981400 0.13939400  
C 3.80641400 -1.22084100 -0.16827600  
C 3.42054000 1.26932100 -0.51475400  
H 2.82977500 0.10796500 1.22584400  
C 5.25773900 -0.93046200 0.25705500  
H 3.77906900 -1.43141500 -1.24746200  
H 3.43176100 -2.11804700 0.33899800  
C 4.87198300 1.55293600 -0.08458900  
H 3.37651700 1.15669000 -1.60728400  
H 2.77623300 2.12058600 -0.26340200  
C 5.79236900 0.35975700 -0.38321500  
H 5.89281400 -1.78409900 -0.01173000  
H 5.30306800 -0.84064300 1.35285800  
H 5.23386000 2.45480000 -0.59446700  
H 4.89628700 1.77239000 0.99358100  
H 6.80872000 0.56637600 -0.02452000  
H 5.86607600 0.22190100 -1.47239400  
W -2.12204200 -0.04634100 -0.05973900

## W-Sc-Hex<sup>-</sup>

E= -1345.5399775

C 0.00274600 0.39833800 0.54401400  
C -4.11443100 -0.32597300 -0.56011700  
O -5.24199300 -0.49535200 -0.83583800

C -1.84729800 -2.04810000 -0.09248400  
O -1.70714300 -3.20154500 -0.09908600  
C -1.68496100 0.10550100 -2.06372200  
O -1.44702300 0.18610700 -3.19802400  
C -2.47148300 2.00433900 -0.03699700  
O -2.64141500 3.15389200 -0.01308600  
C -2.61825800 -0.13156200 1.92161100  
O -2.86951900 -0.19103800 3.05483100  
C 0.40372300 1.26111700 1.50378400  
H -0.33056700 1.82746200 2.07460500  
H 1.44287200 1.45066500 1.78066600  
S 1.18466400 -0.56719200 -0.39267500  
C 2.89569500 -0.10581400 0.14631700  
C 3.85753600 -1.24948300 -0.21996000  
C 3.37208000 1.22143500 -0.46819700  
H 2.87474000 -0.01379900 1.24133400  
C 5.30622700 -0.92202100 0.18873700  
H 3.81662800 -1.42278700 -1.30638500  
H 3.52741200 -2.17977100 0.25876700  
C 4.81492300 1.55673200 -0.04776800  
H 3.32015600 1.13524900 -1.56358300  
H 2.68898400 2.02993500 -0.18611500  
C 5.78163100 0.41534600 -0.40291000  
H 5.97671900 -1.73609800 -0.12313000  
H 5.36710000 -0.87075300 1.28713300  
H 5.13924200 2.49257400 -0.52530500  
H 4.84703900 1.73383800 1.03891200  
H 6.79767900 0.64702000 -0.05146300  
H 5.84139800 0.32354800 -1.49887100  
W -2.18853400 -0.02297000 -0.07699600

**Table S41.** Contribution of solvation free energy for Fischer carbene complexes in acetonitrile (kcal/mol).<sup>a</sup>

|                  | neutral                 |                         |                         |                        | anion                   |                         |                         |                        |
|------------------|-------------------------|-------------------------|-------------------------|------------------------|-------------------------|-------------------------|-------------------------|------------------------|
|                  | $\Delta G_{\text{cav}}$ | $\Delta G_{\text{dis}}$ | $\Delta G_{\text{rep}}$ | $\Delta G_{\text{el}}$ | $\Delta G_{\text{cav}}$ | $\Delta G_{\text{dis}}$ | $\Delta G_{\text{rep}}$ | $\Delta G_{\text{el}}$ |
| <b>Cr-SMe</b>    | 25.43                   | -16.83                  | 2.48                    | -5.51                  | 24.60                   | -16.50                  | 2.44                    | -37.95                 |
| <b>Cr-Si-Pr</b>  | 28.84                   | -19.87                  | 3.11                    | -5.71                  | 27.93                   | -19.58                  | 3.10                    | -37.68                 |
| <b>Cr-St-Bu</b>  | 30.27                   | -20.81                  | 3.21                    | -5.49                  | 29.36                   | -20.56                  | 3.22                    | -37.55                 |
| <b>Cr-Sn-Bu</b>  | 31.08                   | -21.63                  | 3.24                    | -5.64                  | 30.39                   | -21.29                  | 3.20                    | -38.27                 |
| <b>Cr-Sc-Hex</b> | 32.35                   | -23.27                  | 3.58                    | -5.51                  | 31.41                   | -22.90                  | 3.55                    | -38.00                 |
| <b>W-SMe</b>     | 27.00                   | -16.99                  | 2.55                    | -5.43                  | 26.24                   | -16.65                  | 2.51                    | -37.04                 |
| <b>W-Si-Pr</b>   | 30.51                   | -20.02                  | 3.17                    | -5.60                  | 29.71                   | -19.77                  | 3.19                    | -36.63                 |
| <b>W-St-Bu</b>   | 31.90                   | -20.97                  | 3.28                    | -5.53                  | 30.99                   | -20.71                  | 3.29                    | -36.45                 |
| <b>W-Sn-Bu</b>   | 32.75                   | -21.77                  | 3.30                    | -5.59                  | 31.98                   | -21.47                  | 3.28                    | -37.19                 |
| <b>W-Sc-Hex</b>  | 34.00                   | -23.47                  | 3.67                    | -5.42                  | 33.20                   | -23.17                  | 3.65                    | -36.98                 |

<sup>a</sup> All values have computed in CPCM model, UAKS cavities and 250 tesserae per sphere with an average area of  $0.3 \text{ \AA}^2$  were used.

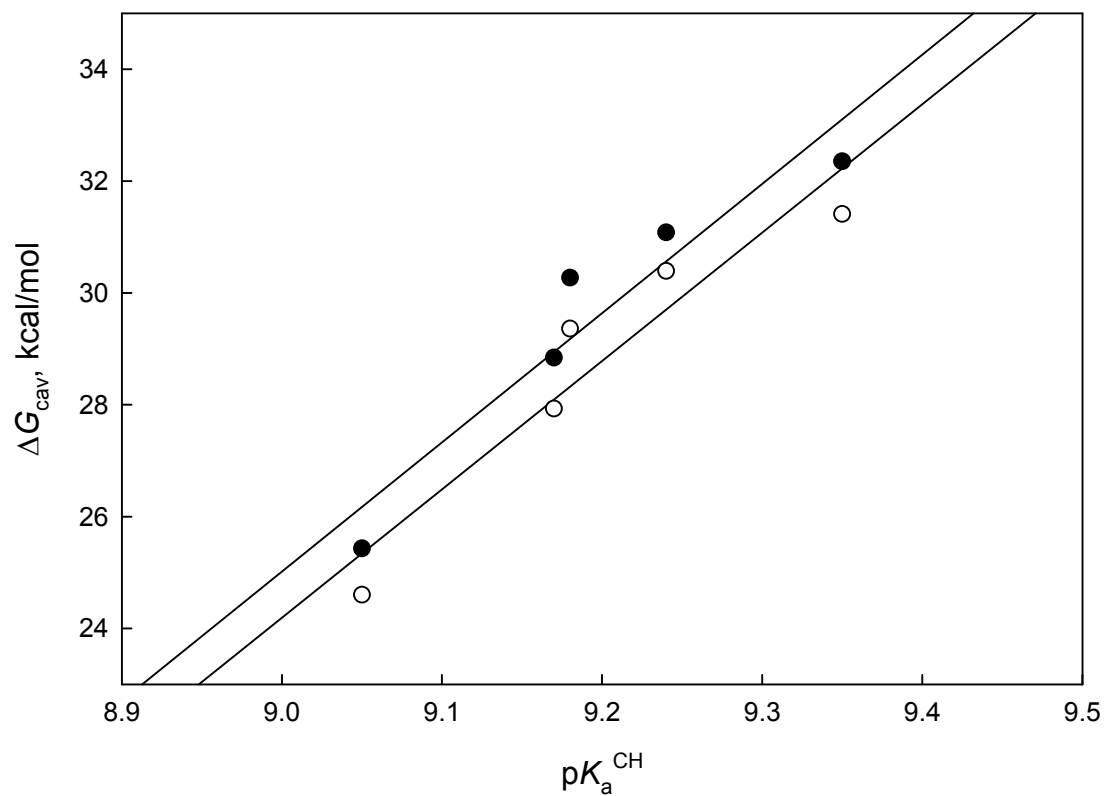

**Fig. S2.** Plot of  $\Delta G_{cav}$  (in kcal/mol) vs.  $pK_a^{CH}$  for (●) neutral Fischer carbenes **Cr-SR**, slope =  $(23 \pm 4)$  kcal/mol  $r^2 = 0.907867$ ; and (○) Anions of the Fischer carbenes **Cr-SR**, slope =  $(23 \pm 4)$  kcal/mol  $r^2 = 0.900524$ .

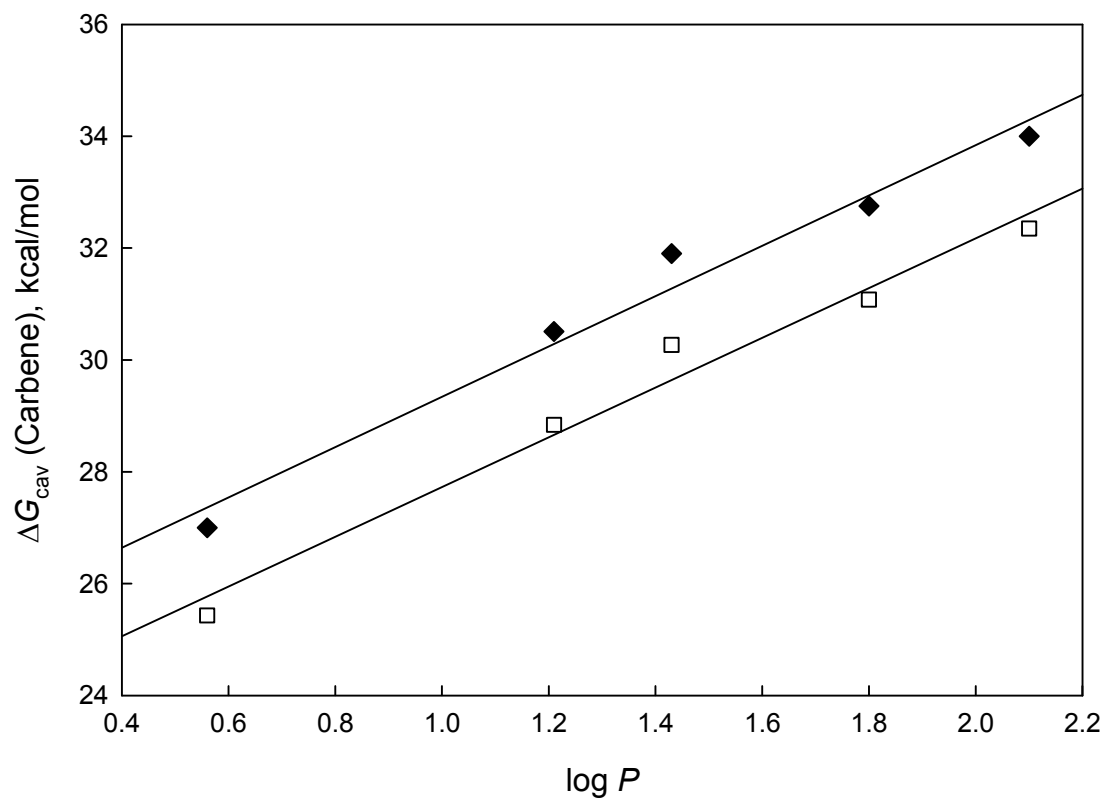

**Fig S3.** Plot of  $\Delta G_{\text{cav}}$  (in kcal/mol) vs.  $\log P$  for the neutral Fischer carbenes (□) **Cr-SR**, slope =  $(4.4 \pm 0.4)$  kcal/mol  $r^2 = 0.977564$ ; and (◆) **W-SR**, slope =  $(4.5 \pm 0.4)$  kcal/mol  $r^2 = 0.976042$ .

## Spectroscopic characterization of the Fischer carbenes **W-SR**.

**W-Sn-Bu:**  $^1\text{H}$  NMR  $\delta$  0.97 (t, 3H,  $\text{SCH}_2\text{CH}_2\text{CH}_2\text{CH}_3$ ), 1.44 – 1.50 (m, 2H,  $\text{SCH}_2\text{CH}_2\text{CH}_2\text{CH}_3$ ), 1.67 – 1.73 (m, 2H,  $\text{SCH}_2\text{CH}_2\text{CH}_2\text{CH}_3$ ), 3.00 (t, 2H,  $\text{SCH}_2\text{CH}_2\text{CH}_2\text{CH}_3$ ), 3.37 (s, 3H,  $\text{CH}_3$ ).  $^{13}\text{C}$  NMR  $\delta$  13.6 ( $\text{SCH}_2\text{CH}_2\text{CH}_2\text{CH}_3$ ), 22.0 ( $\text{SCH}_2\text{CH}_2\text{CH}_2\text{CH}_3$ ), 28.7 ( $\text{SCH}_2\text{CH}_2\text{CH}_2\text{CH}_3$ ), 42.8 ( $\text{SCH}_2\text{CH}_2\text{CH}_2\text{CH}_3$ ), 47.8 ( $\text{CH}_3$ ), 197.7 (CO, equatorial), 207.4 (CO, axial), 332.3 (C=). FT IR ( $\text{cm}^{-1}$ ) 2962.4 w, 2914.9 w, 2067.3 m, 1940.6 s, 1263.4 w, 1093.1 w, 1017.8 w, 942.6 w, 887.1 w, 804.0 w, 570.3 w. UV-vis (50% MeCN – 50% Water):  $\lambda_{\text{max}} = 435$  nm ( $\epsilon \approx 10779 \text{ M}^{-1}\text{cm}^{-1}$ ). HRMS (nitrobenzyl alcohol): calcd for  $\text{C}_{11}\text{H}_{12}\text{O}_5\text{SW}$  440.9988, obtained 440.9981.

**W-Si-Pr:**  $^1\text{H}$  NMR  $\delta$  1.37– 1.39 (d, 6H,  $\text{SCH}(\text{CH}_3)_2$ ), 3.44 (s, 3H,  $\text{CH}_3$ ), 3.75 – 3.86 (m, 1H,  $\text{SCH}(\text{CH}_3)_2$ ).  $^{13}\text{C}$  NMR  $\delta$  21.3 ( $\text{SCH}(\text{CH}_3)_2$ ), 46.4 ( $\text{SCH}(\text{CH}_3)_2$ ), 47.2 ( $\text{CH}_3$ ), 197.7 (CO, equatorial), 207.3 (CO, axial), 330.5 (C=). FT IR ( $\text{cm}^{-1}$ ) 2976.4 w, 2064.9 m, 1980.1 m, 1936.6 s, 1338.4 w, 1238.5 w, 1108.3, 1041.7 w, 764.4 w, 598.0 w, 570.3 w, 423.8 w. UV-vis (50% MeCN – 50% Water):  $\lambda_{\text{max}} = 436$  nm ( $\epsilon \approx 11500 \text{ M}^{-1}\text{cm}^{-1}$ ). HRMS (nitrobenzyl alcohol): calcd for  $\text{C}_{10}\text{H}_{10}\text{O}_5\text{SW}$  426.9831, obtained 426.9812.

**W-St-Bu:**  $^1\text{H}$  NMR  $\delta$  1.56 (s, 9H,  $\text{SC}(\text{CH}_3)_3$ ), 3.64 (s, 3H,  $\text{CH}_3$ ).  $^{13}\text{C}$  NMR  $\delta$  29.8 ( $\text{SC}(\text{CH}_3)_3$ ), 48.0 ( $\text{SC}(\text{CH}_3)_3$ ), 61.6 ( $\text{CH}_3$ ), 197.3 (CO, equatorial), 207.2 (CO, axial), 334.5 (C=). FT-IR ( $\text{cm}^{-1}$ ) 2998.0 w, 2958.4 w, 2067.3 m, 1992.1 m, 1956.4 s, 1928.7 s, 1897.0 s, 1370.3 w, 1342.6 w, 1156.4 w, 1116.8 w, 1069.3 w, 934.7 w, 764.4 m, 594.1 m, 578.2 m. UV-vis (50% MeCN – 50% Water):  $\lambda_{\text{max}} = 441$  nm ( $\epsilon \approx 14627 \text{ M}^{-1}\text{cm}^{-1}$ ). HRMS (nitrobenzyl alcohol): calcd for  $\text{C}_{11}\text{H}_{12}\text{O}_5\text{SW}$  440.9988, obtained 440.9978.

**W-Sc-Hex:**  $^1\text{H}$  NMR  $\delta$  1.31 – 2.08 (m, 11H,  $\text{SC}_6\text{H}_{11}$ ), 3.43 (s, 3H,  $\text{CH}_3$ ).  $^{13}\text{C}$  NMR  $\delta$  25.1, 25.6, 31.2, 47.1 ( $\text{SC}_6\text{H}_{11}$ ), 54.4 ( $\text{CH}_3$ ), 197.7 (CO, equatorial), 207.3 (CO, axial), 330.3 (C=). FT IR ( $\text{cm}^{-1}$ ) 2935.8 w, 2859.4 w, 2080.3 m, 1988.7 m, 1932.3 s, 1917.4 s, 1895.1 s, 1443.8 w, 1102.7 w, 776.8 m, 593.5 m, 573.5 m. UV-vis (50% MeCN-50% Water):  $\lambda_{\text{max}} = 437$  nm ( $\epsilon \approx 11954 \text{ M}^{-1}\text{cm}^{-1}$ ). HRMS (nitrobenzyl alcohol): calcd for  $\text{C}_{13}\text{H}_{14}\text{O}_5\text{SW}$  467.0144, obtained 467.0147.

NMR and FT-IR Spectra

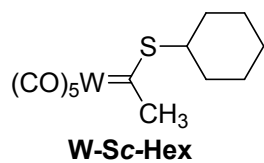

NMR  $^1\text{H}$  ( $\text{CDCl}_3$ ) A1

NMR  $^{13}\text{C}$  ( $\text{CDCl}_3$ ) A2

FT-IR (KCl) A3

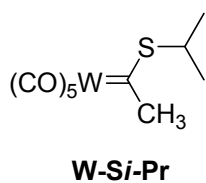

NMR  $^1\text{H}$  ( $\text{CDCl}_3$ ) B1

NMR  $^{13}\text{C}$  ( $\text{CDCl}_3$ ) B2

FT-IR (KCl) B3

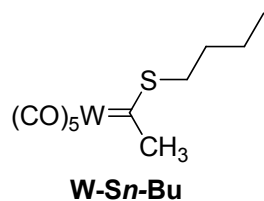

NMR  $^1\text{H}$  ( $\text{CDCl}_3$ ) C1

NMR  $^{13}\text{C}$  ( $\text{CDCl}_3$ ) C2

FT-IR (KCl) C3

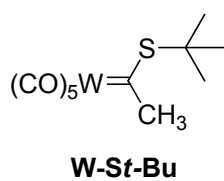

NMR  $^1\text{H}$  ( $\text{CDCl}_3$ ) D1

NMR  $^{13}\text{C}$  ( $\text{CDCl}_3$ ) D2

FT-IR (KCl) D3



A1

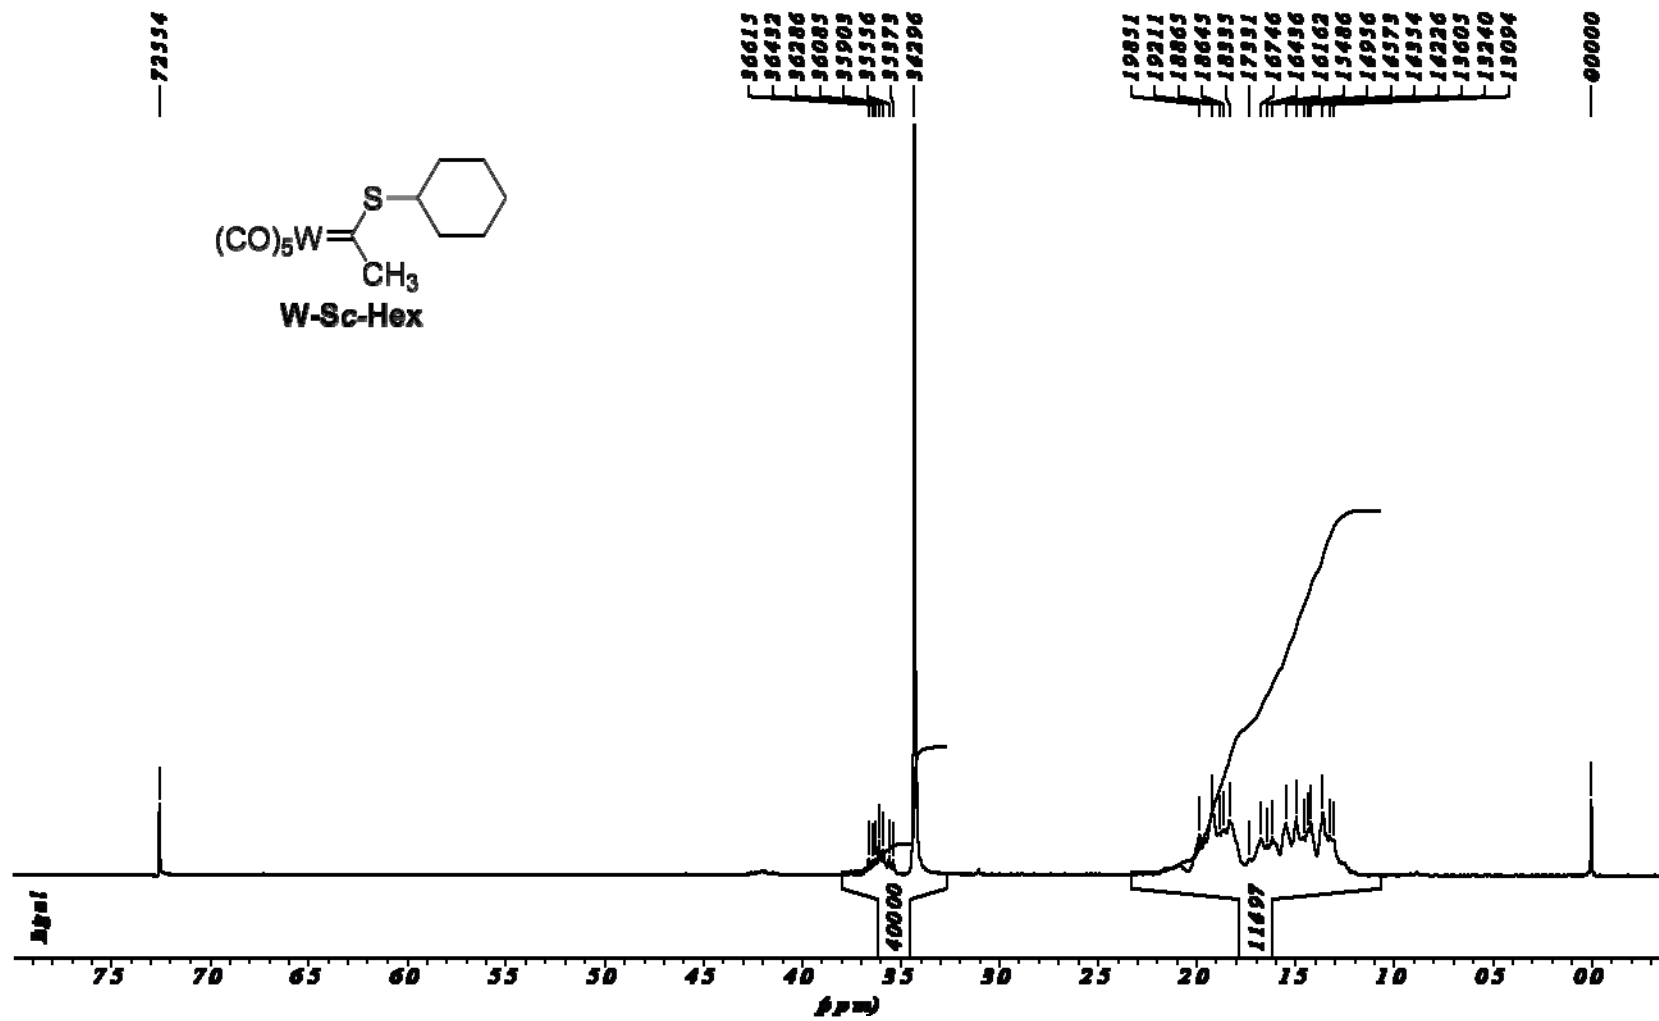

A2

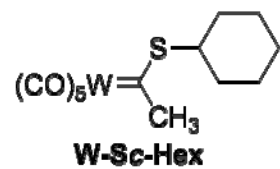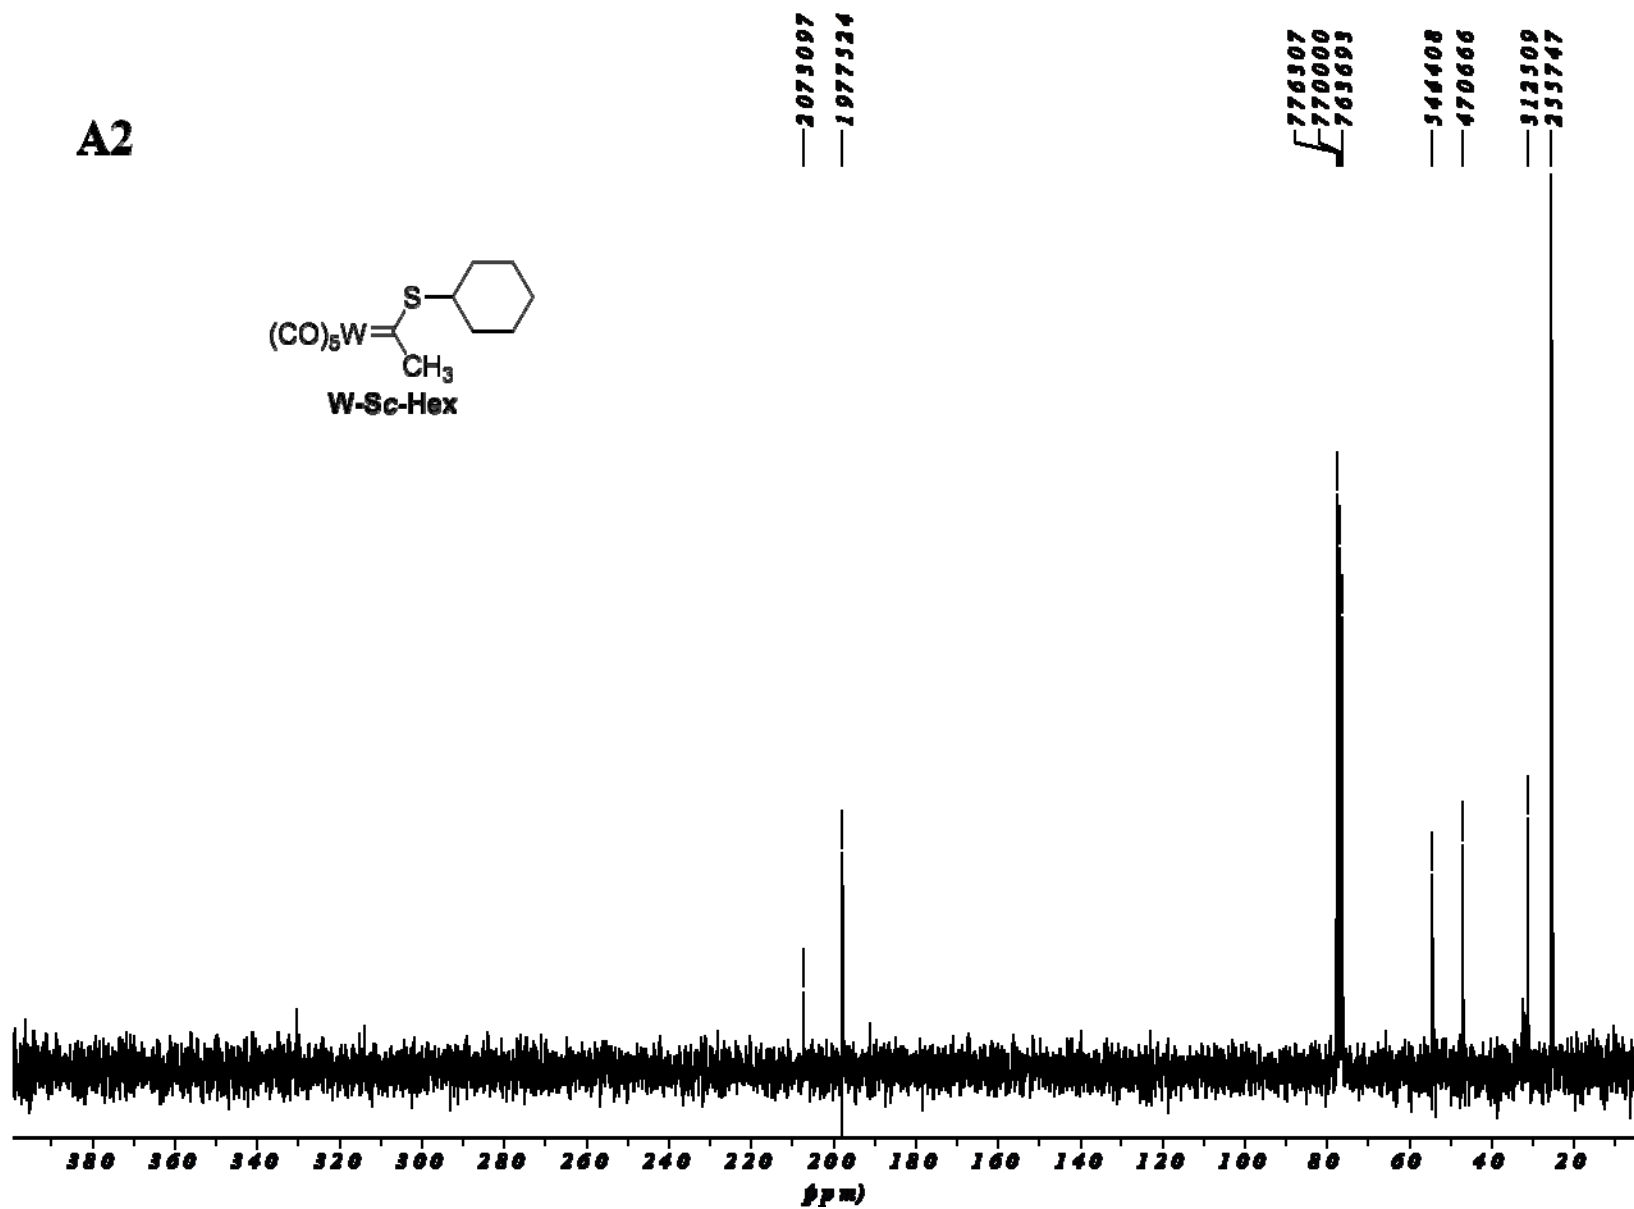

S42

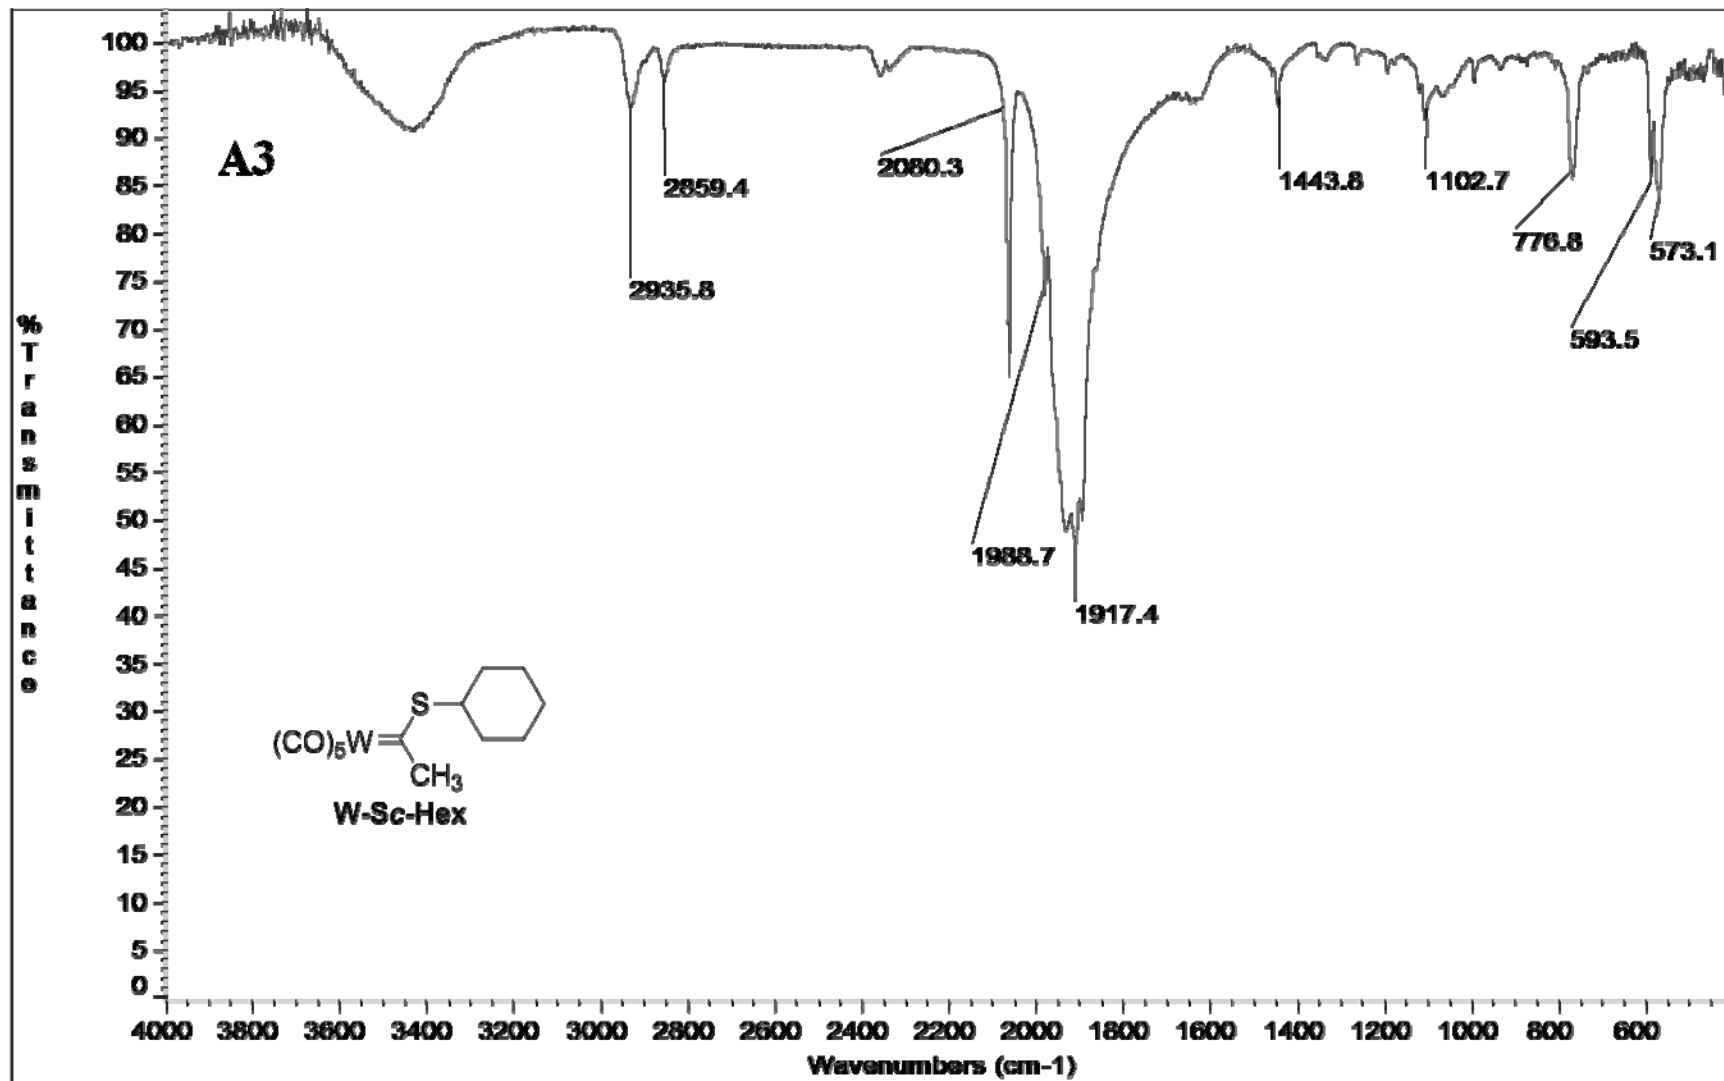

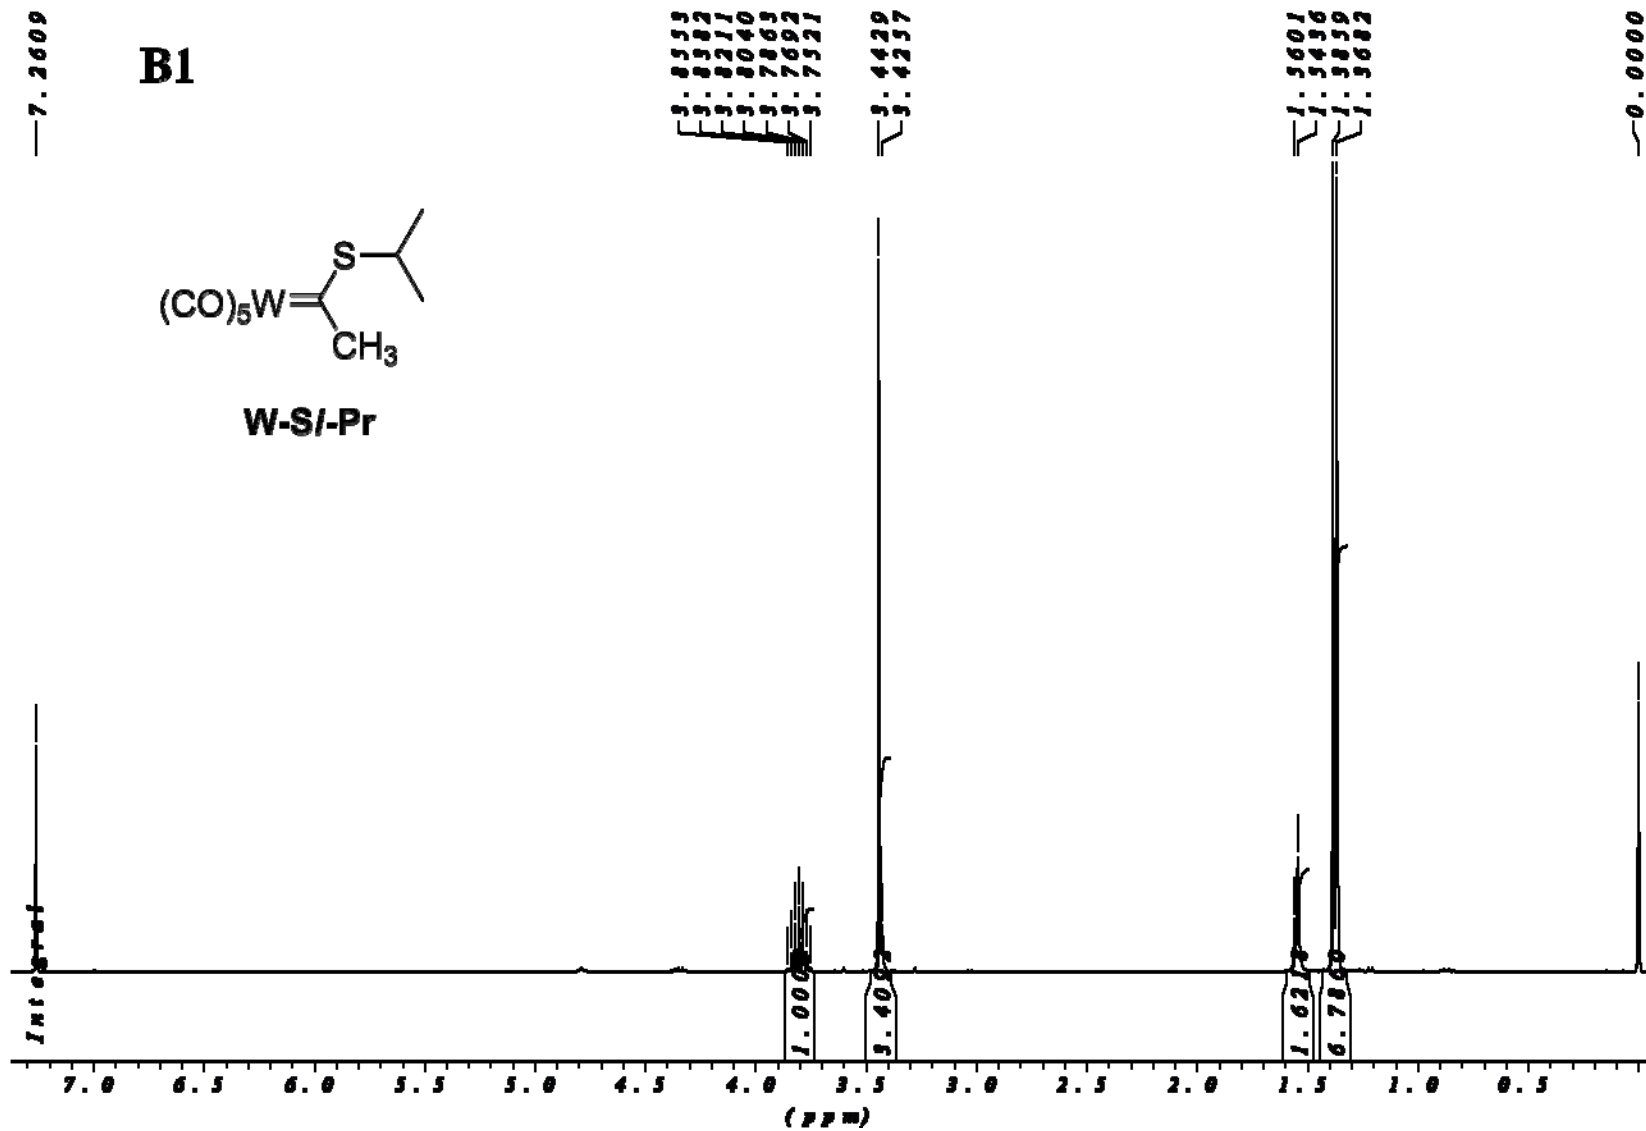

**B2**

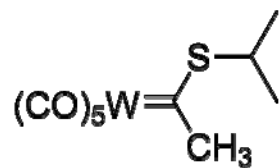

**W-Si-Pr**

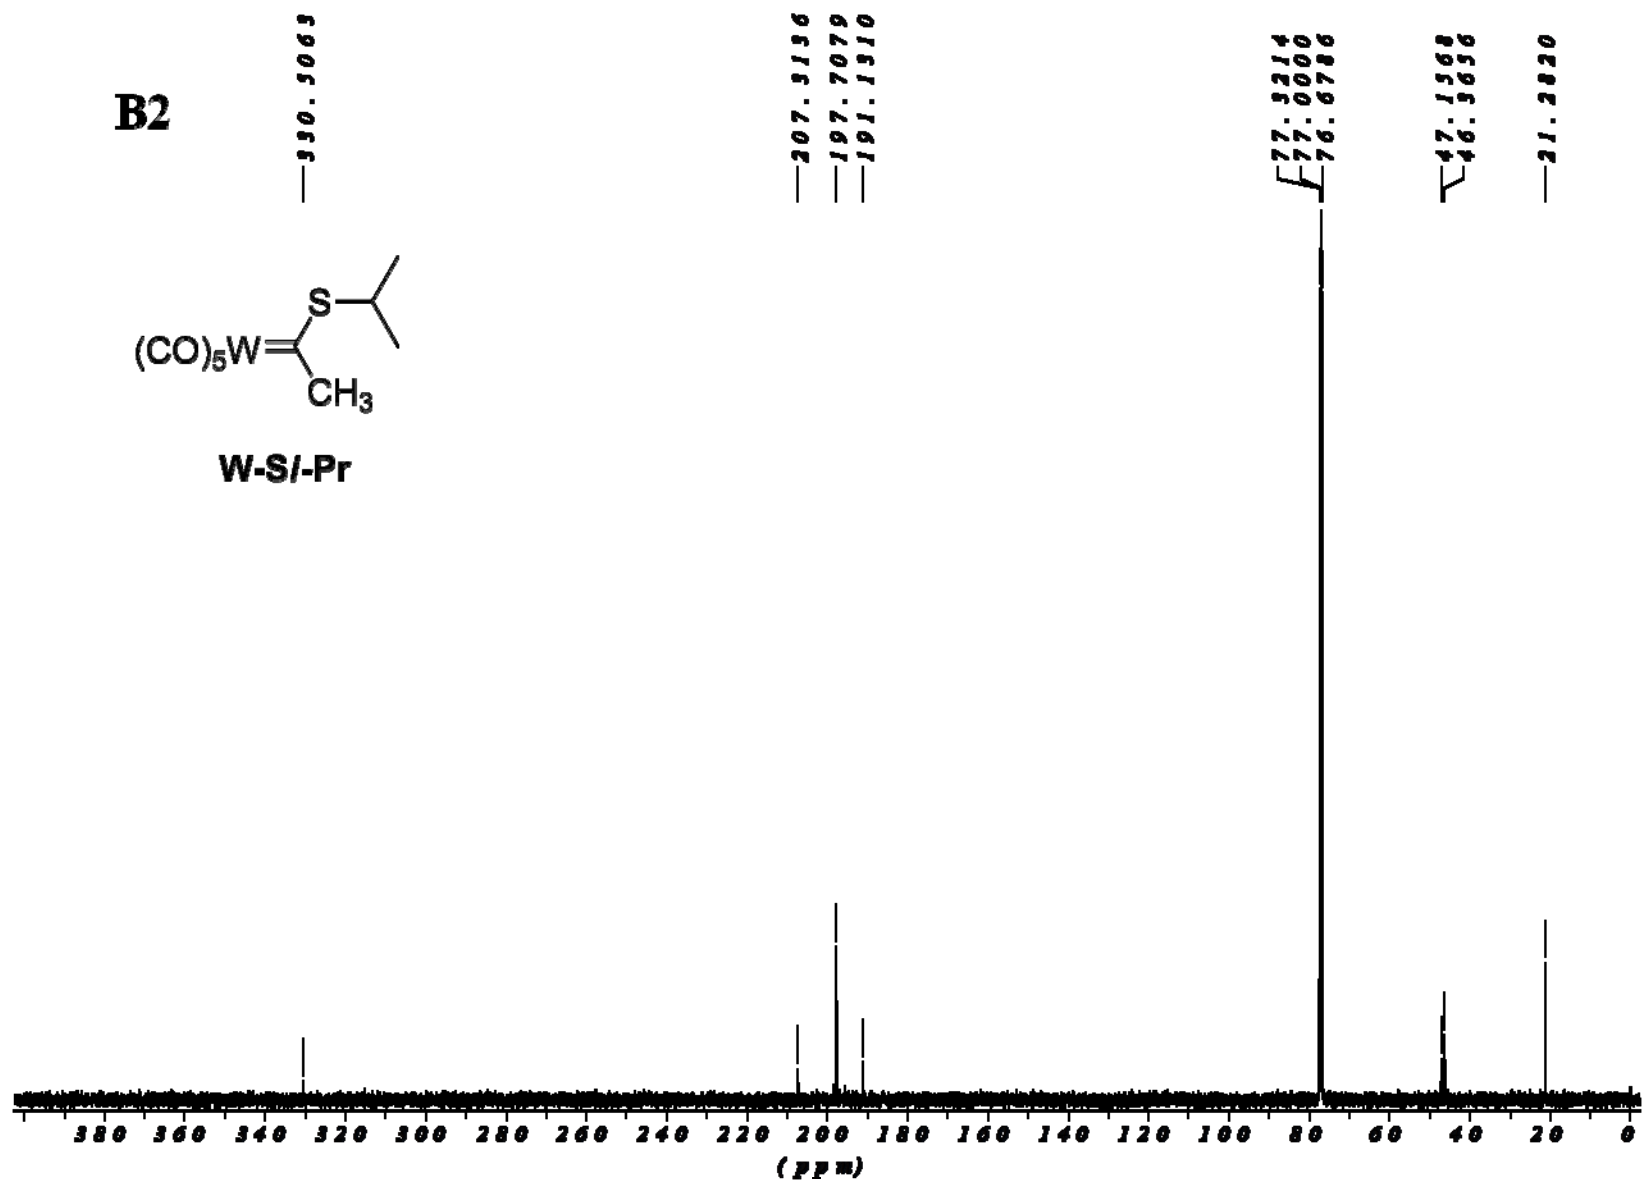

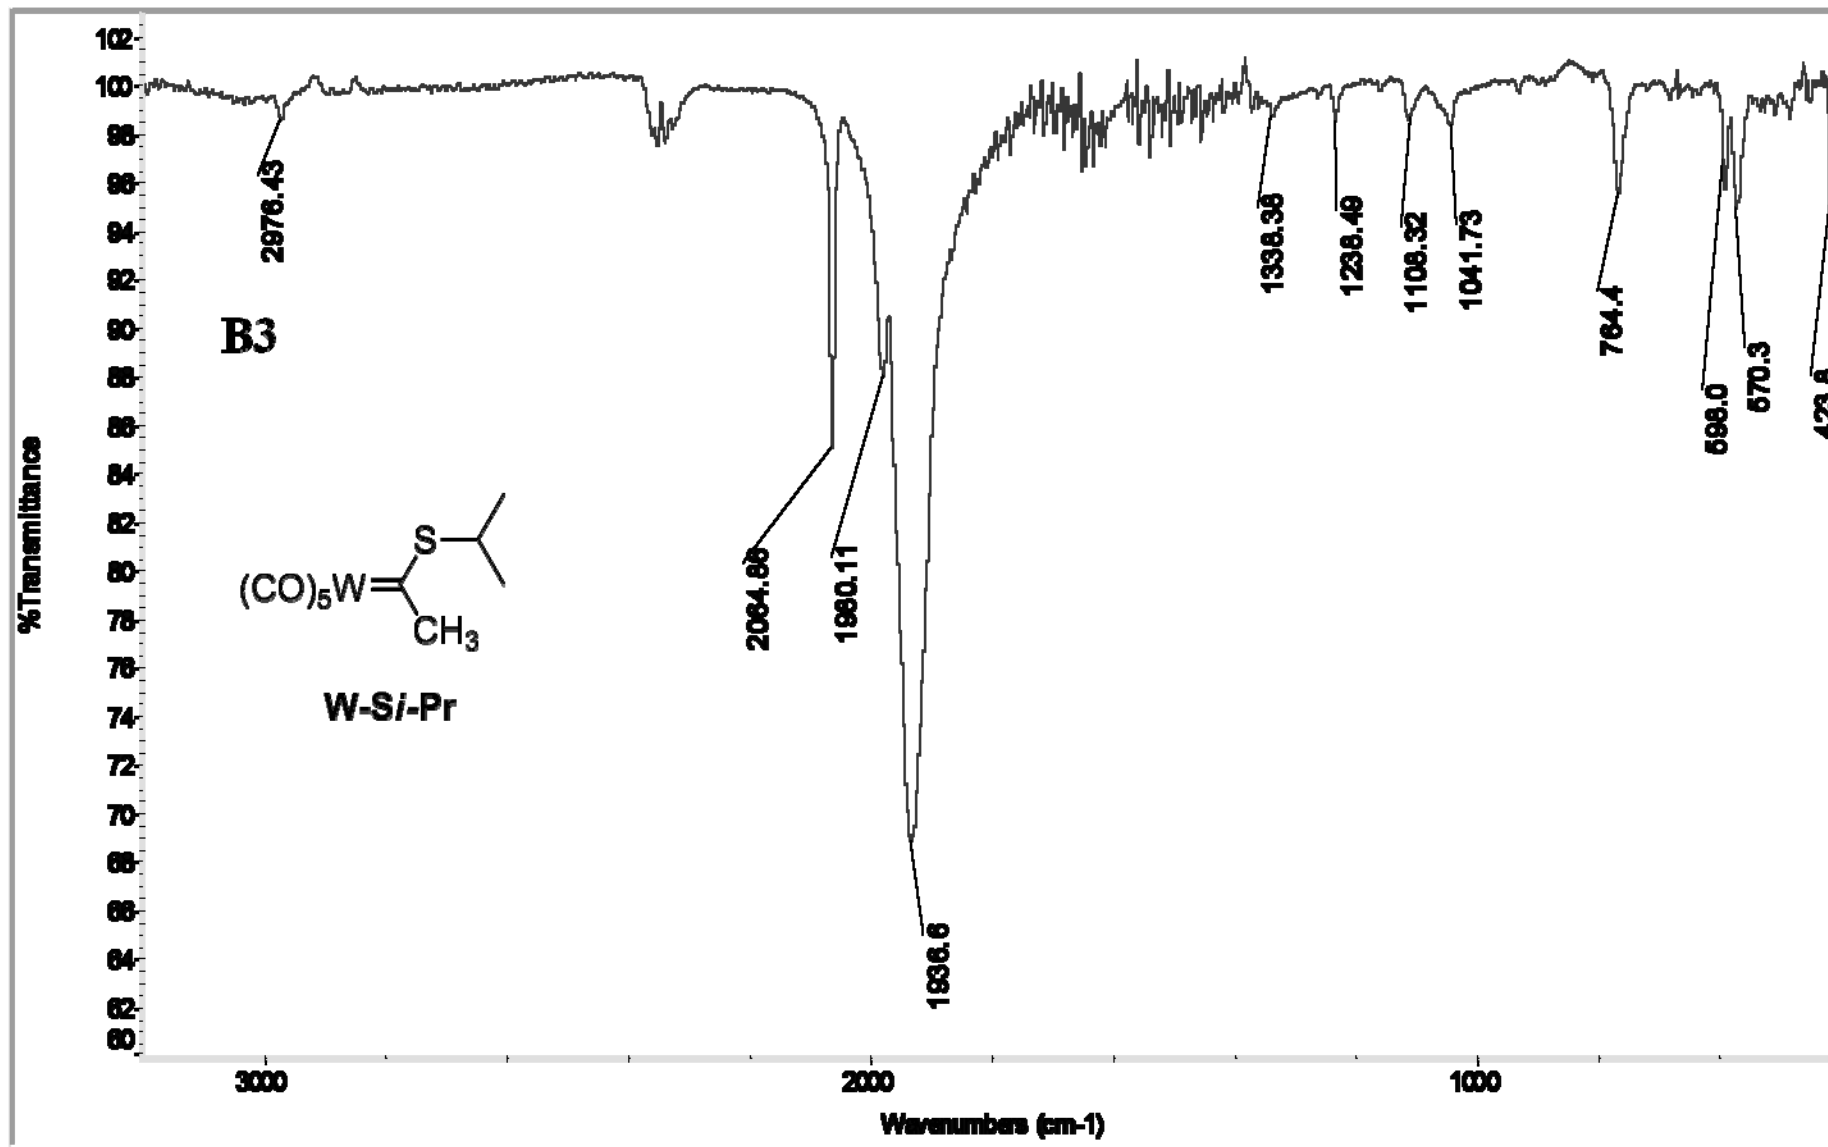

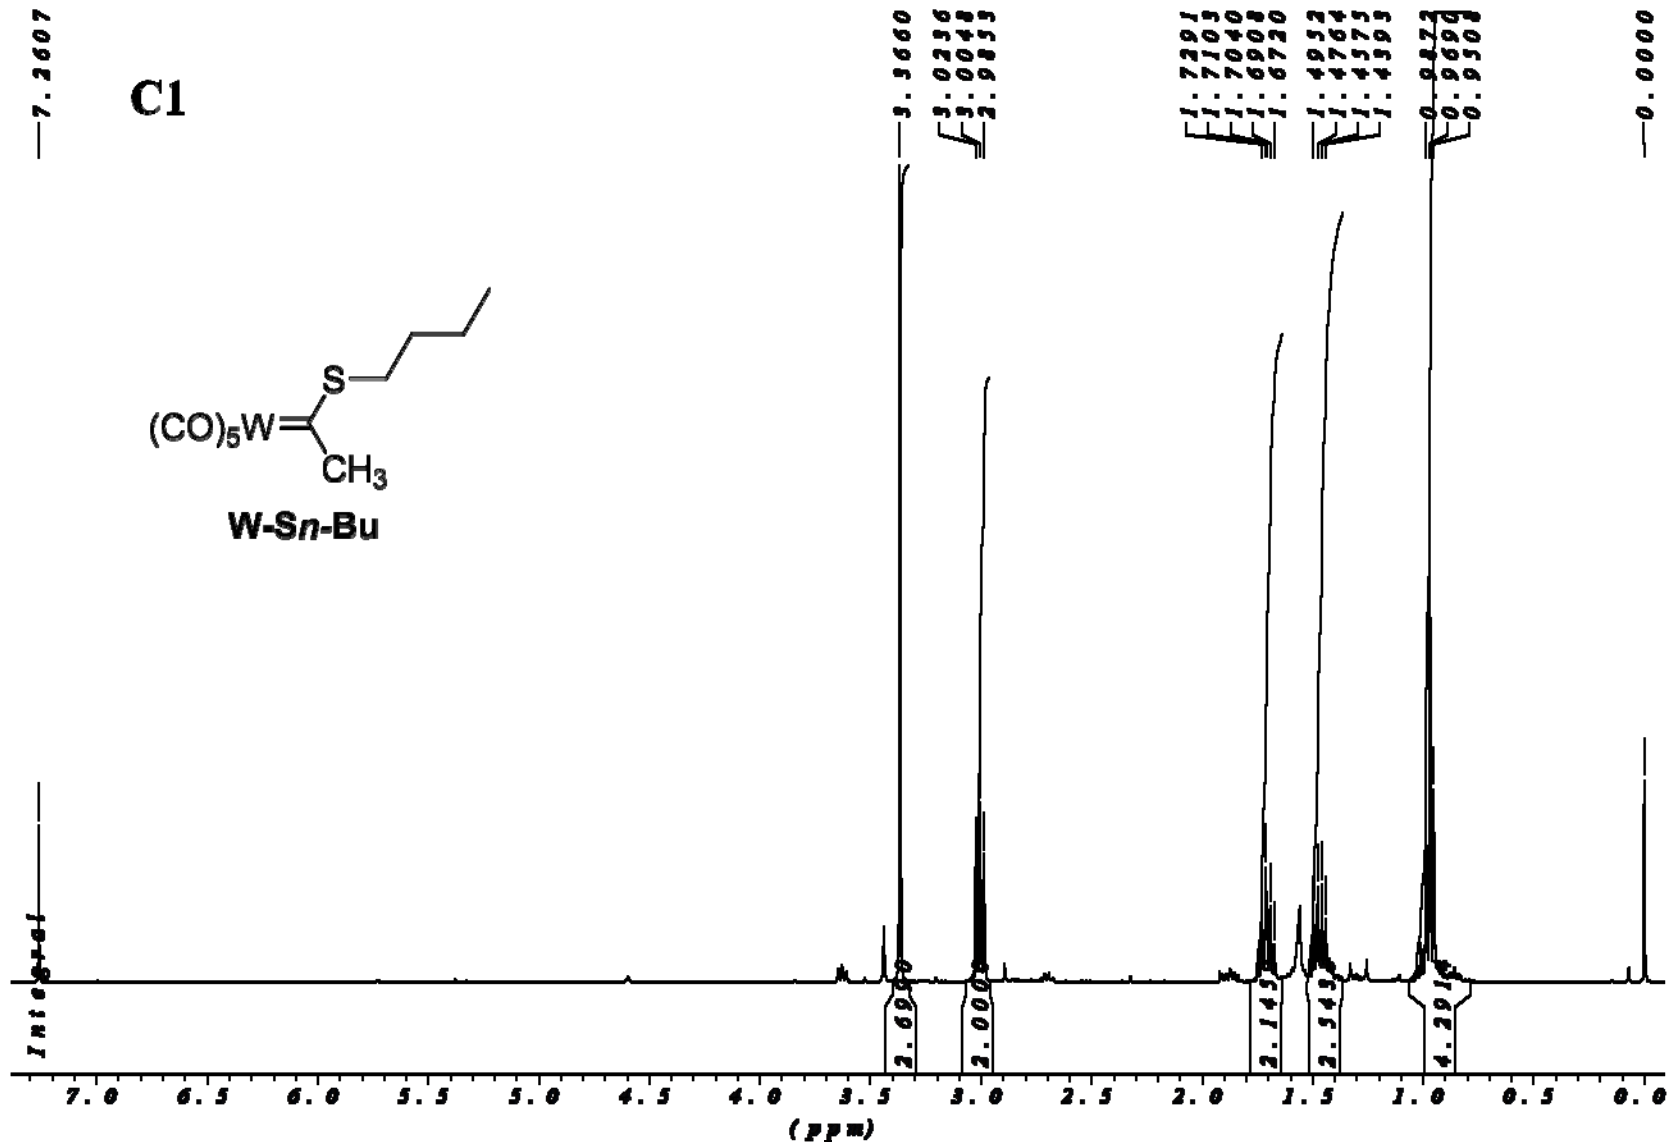

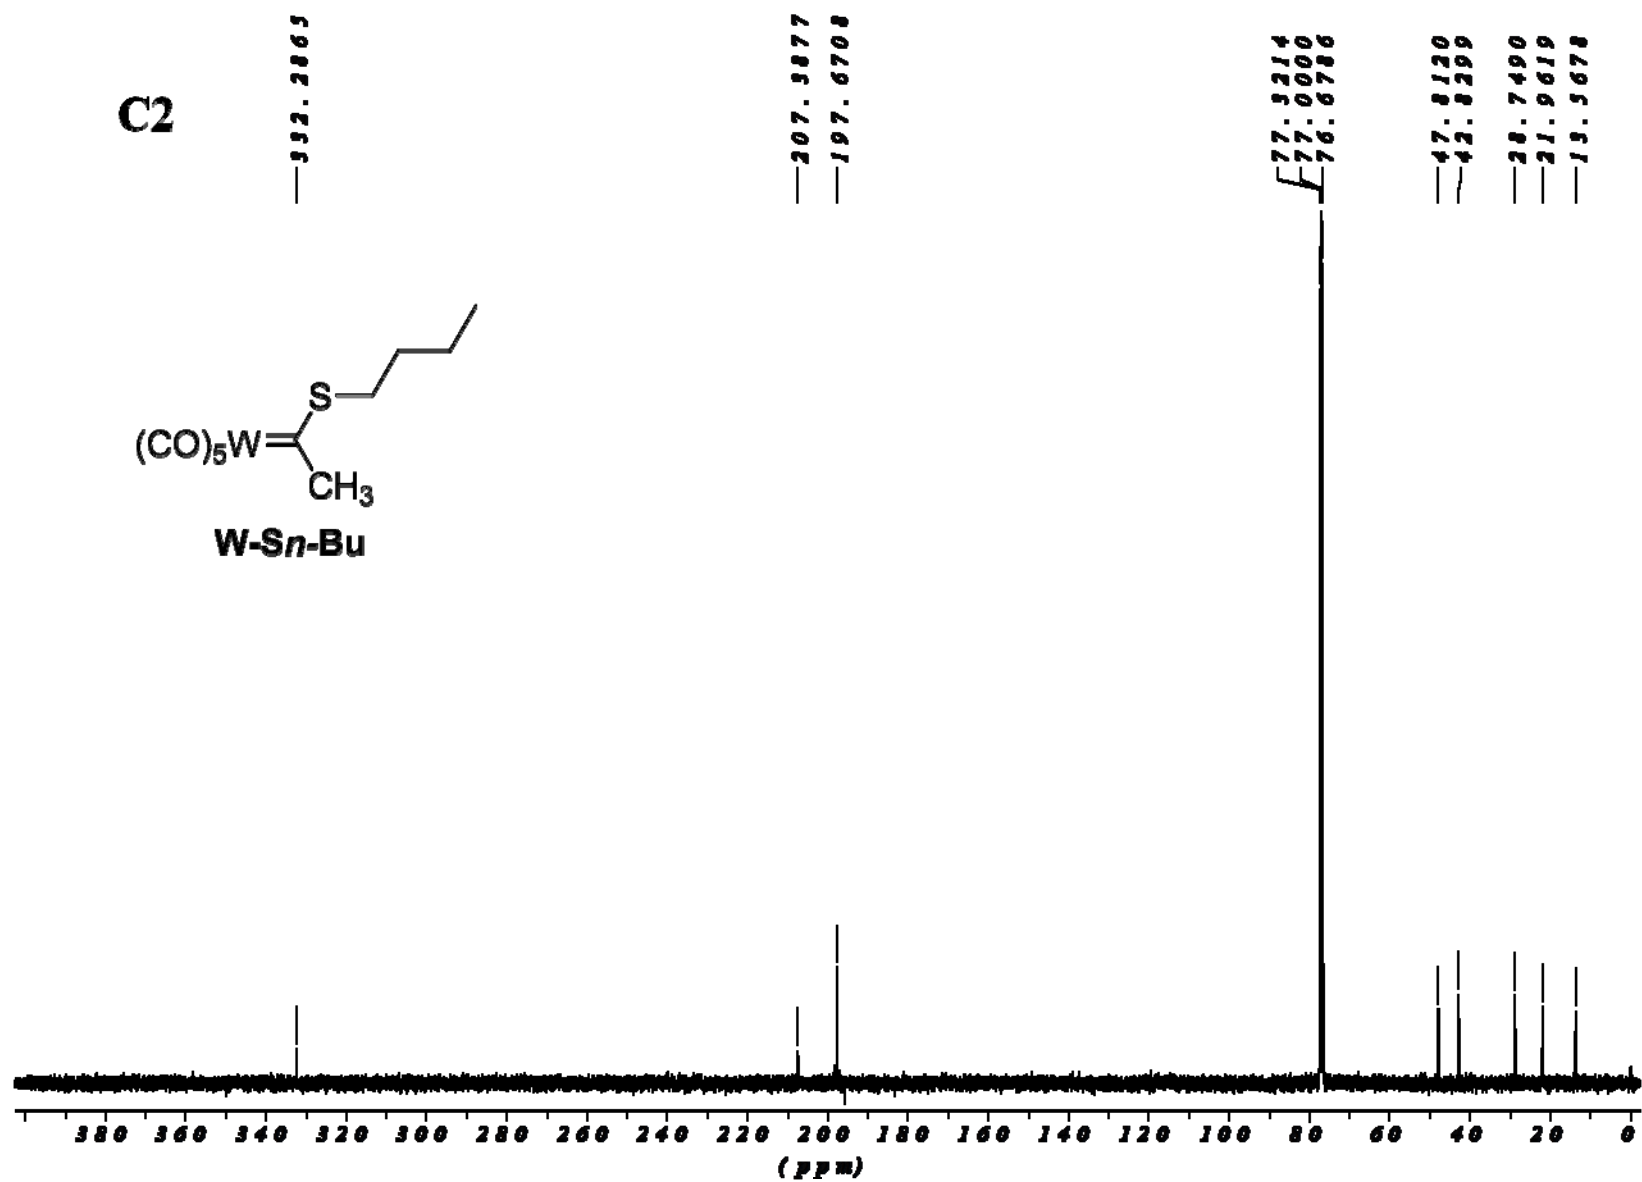



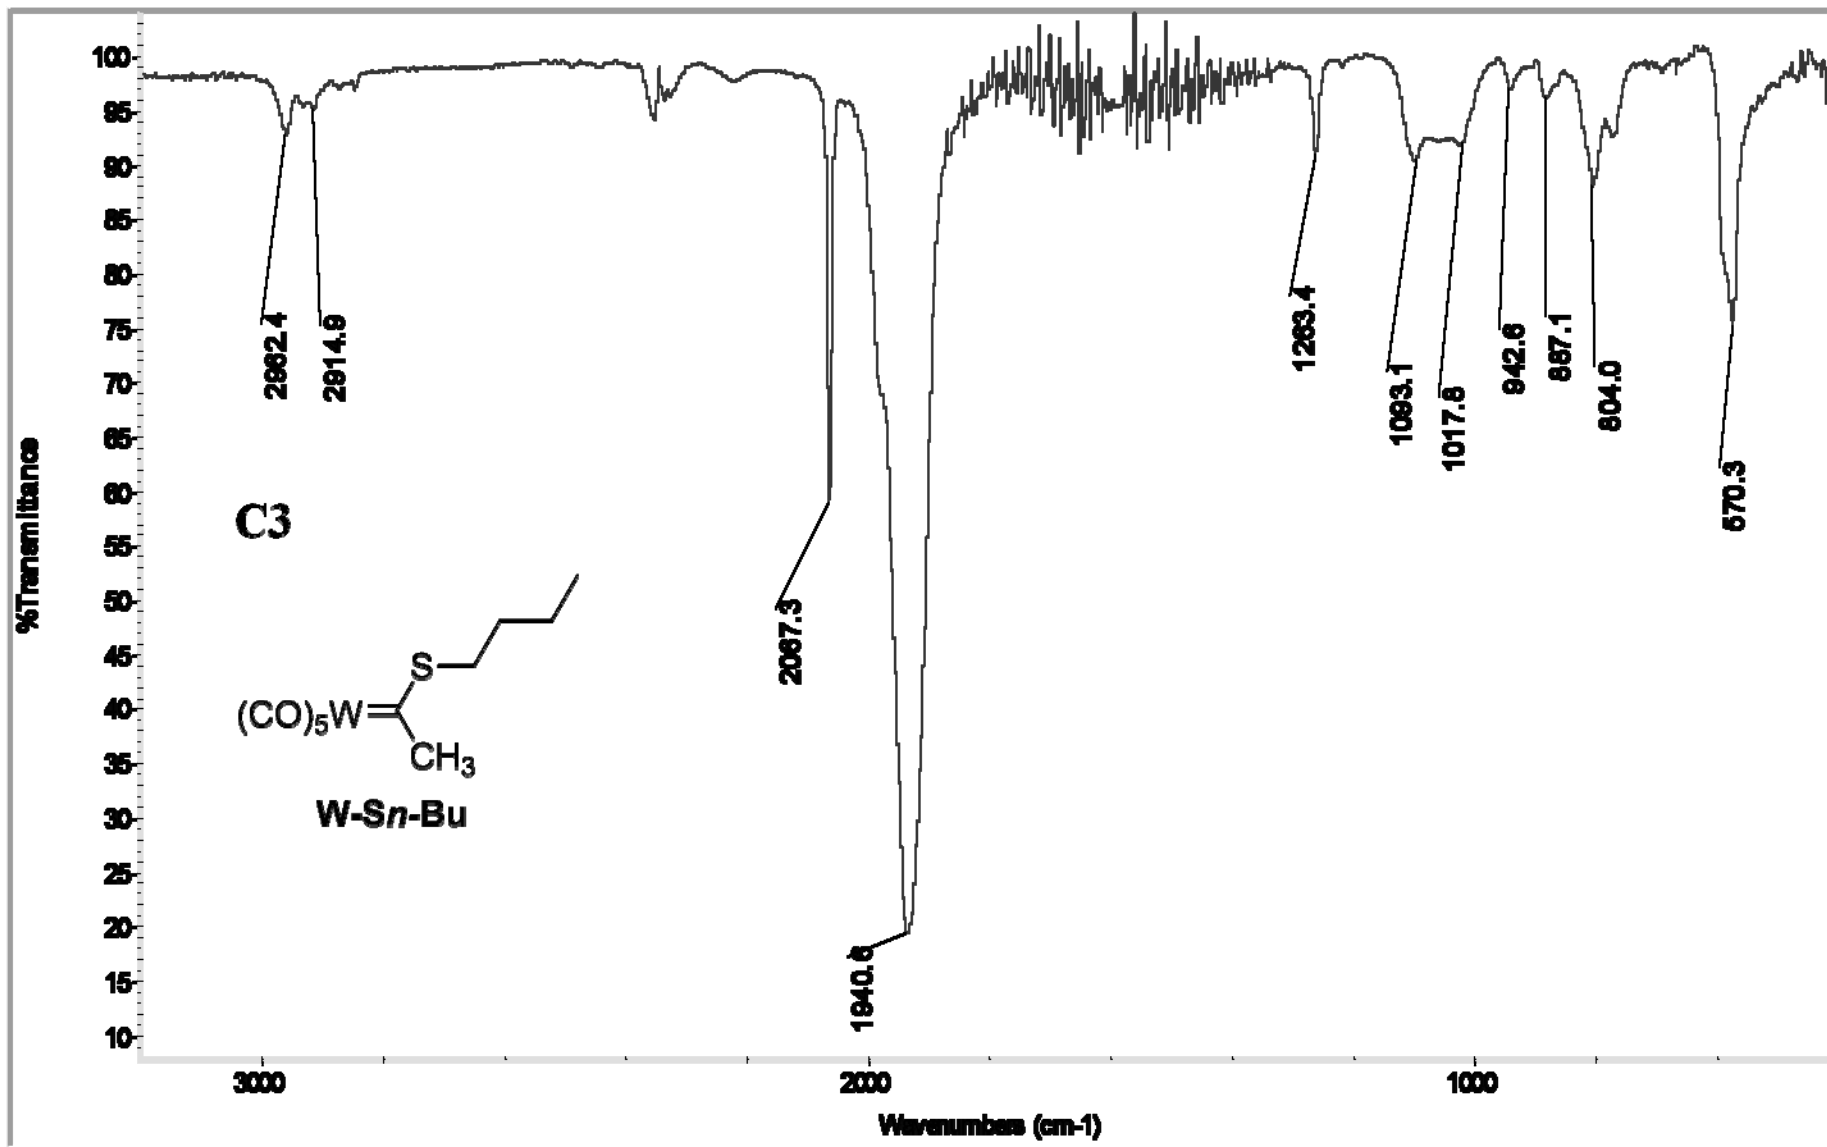

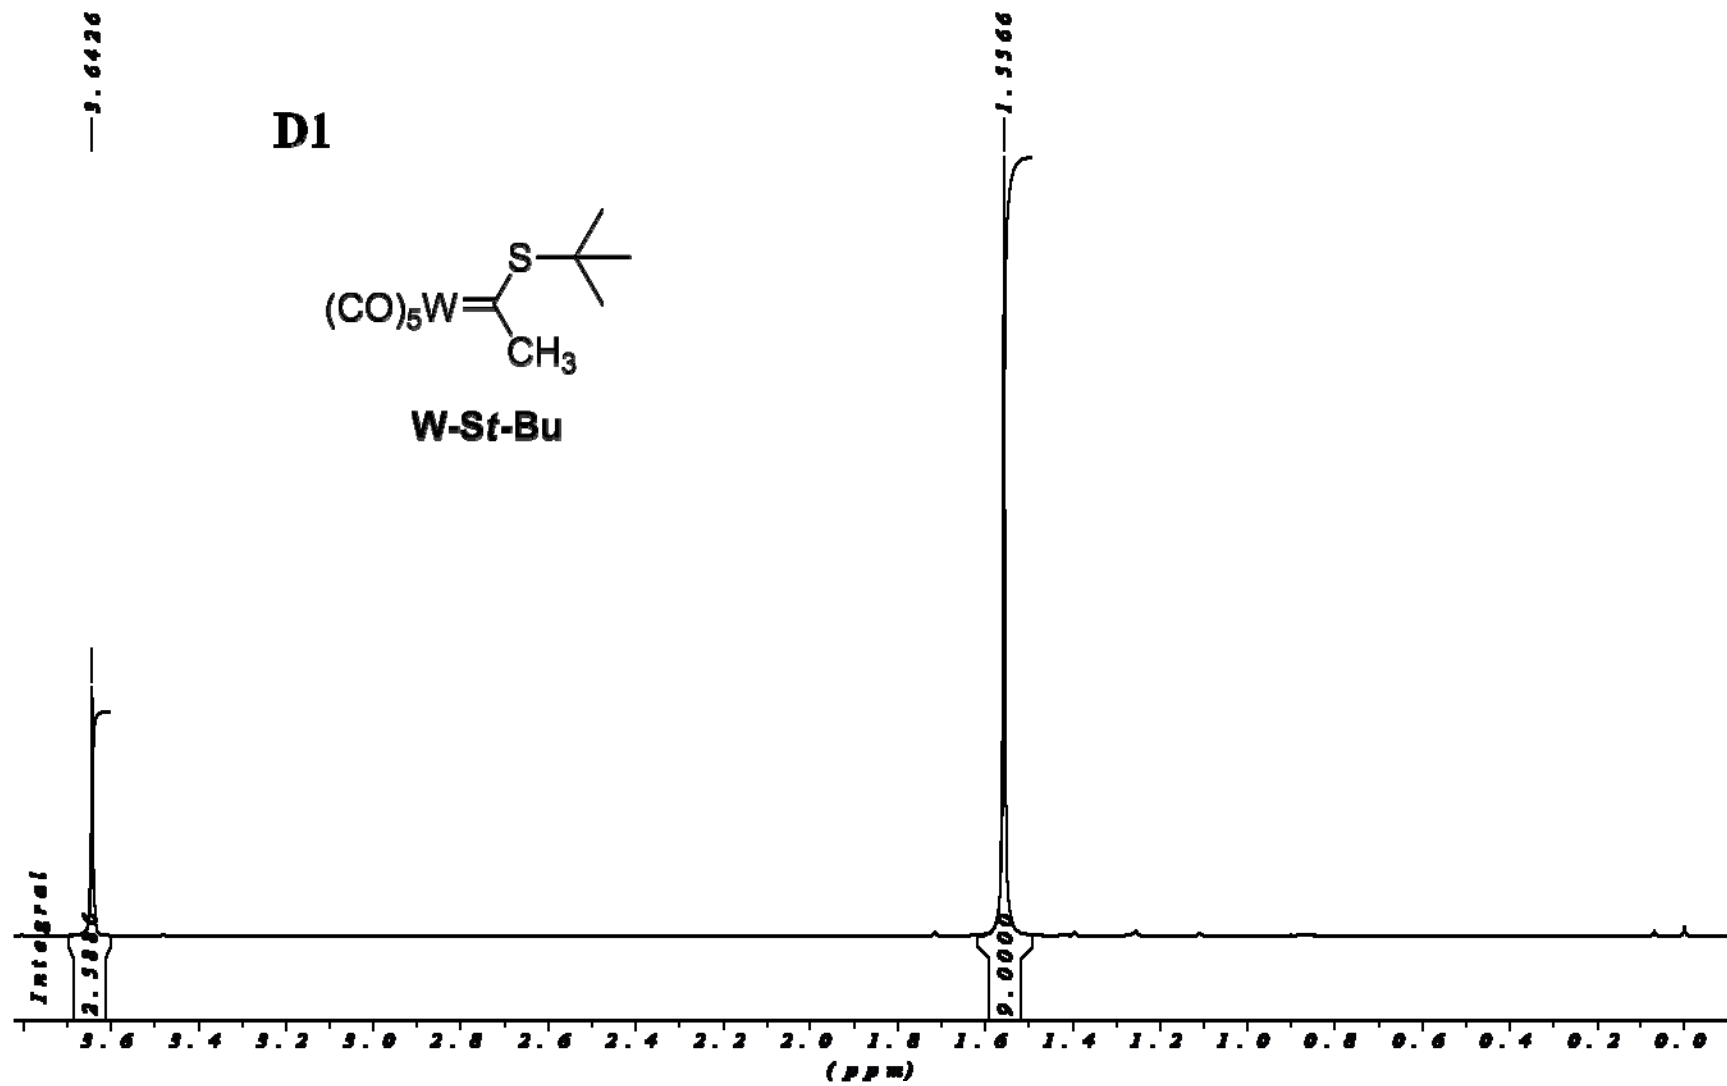

D2

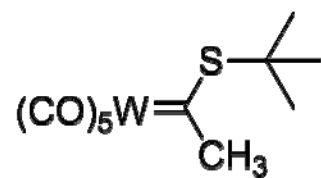

W-Sf-Bu

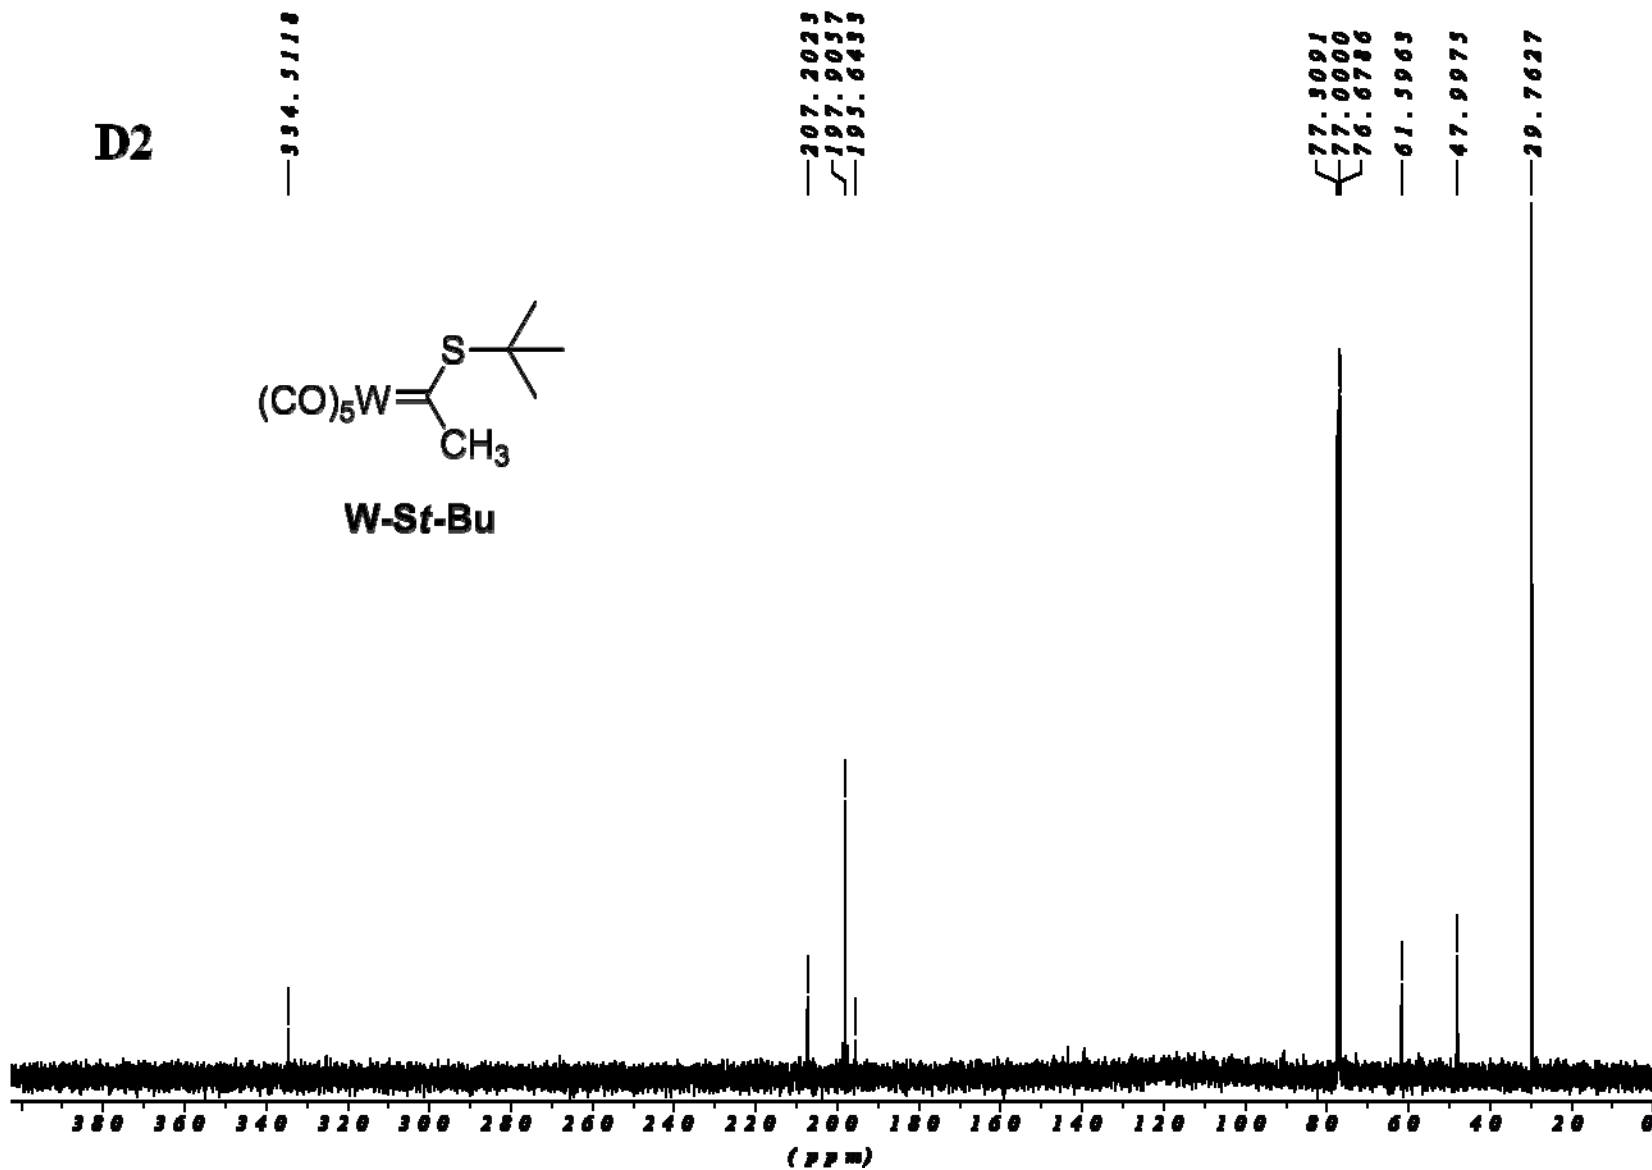

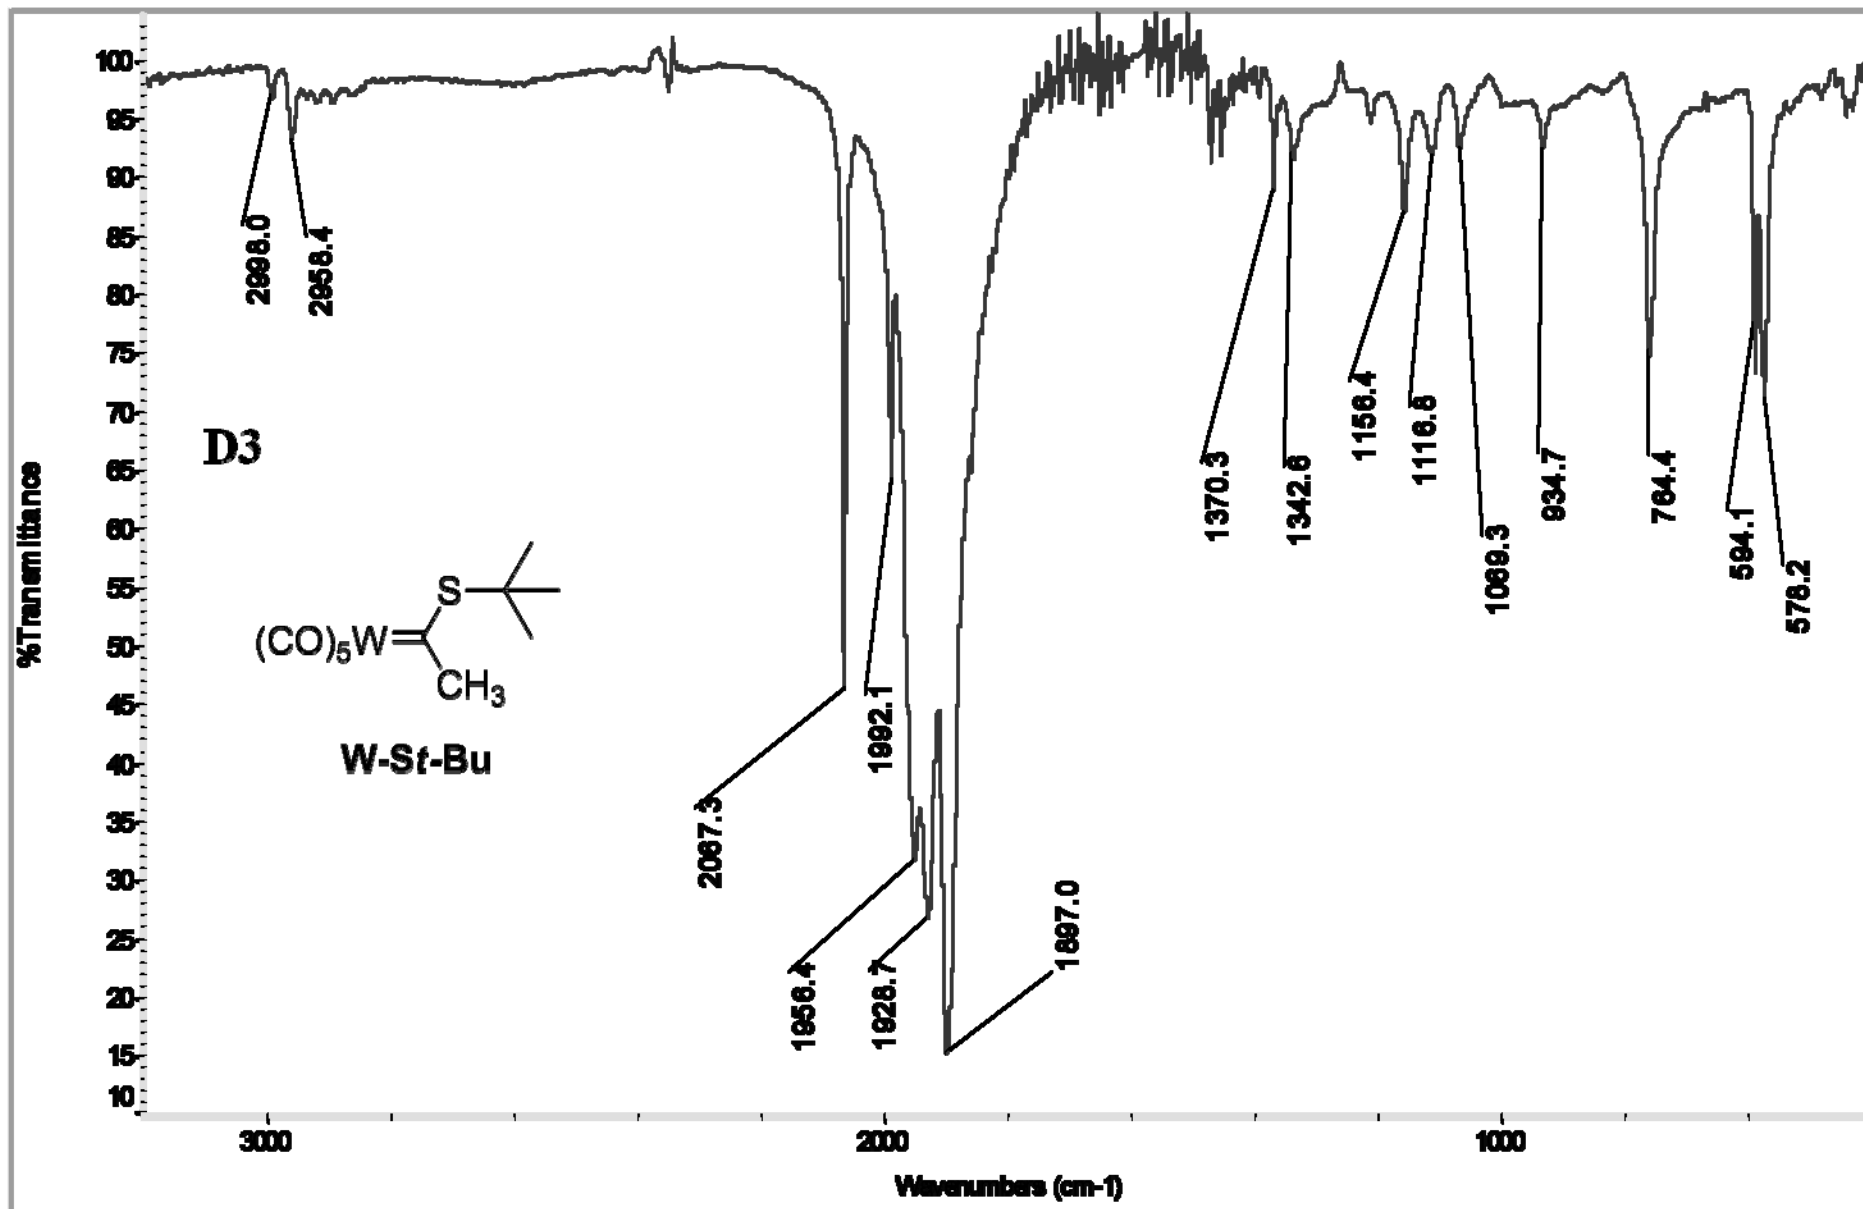

Supplement: c000141d.pdf [file c000141d.pdf]
